# Supplementary material for: Modelling POLG mutations in mice unravels a critical role of POLγΒ in regulating phenotypic severity
Source: Springer Nature journal article supplement (doi:10.1038/s41467-025-60059-y), 2025-05-22
Supplement: MOESM1 [file 41467_2025_60059_MOESM1_ESM.pdf]

## Supplementary Information

### Modelling POLG mutations in mice unravels a critical role of POL $\gamma$ B in regulating phenotypic severity

Samantha Corrà<sup>1\*</sup>, Alessandro Zuppardo<sup>1,3\*</sup>, Sebastian Valenzuela<sup>2\*</sup>, Louise Jenner<sup>2\*</sup>, Raffaele Cerutti<sup>1,3</sup>, Sirelin Sillamaa<sup>2</sup>, Emily Hoberg<sup>2</sup>, Katarina A.S. Johansson<sup>2</sup>, Urska Rovsnič<sup>2</sup>, Sara Volta<sup>1,3</sup>, Pedro Silva-Pinheiro<sup>4</sup>, Hannah Davis<sup>5</sup>, Aleksandra Trifunović<sup>6</sup>, Michal Minczuk<sup>5,7</sup>, Claes M Gustafsson<sup>2</sup>, Anu Suomalainen<sup>8,9</sup>, Massimo Zeviani<sup>10, 11</sup>, Bertil Macao<sup>2</sup>, Xuefeng Zhu<sup>2,12,13#</sup>, Maria Falkenberg<sup>2#</sup>, Carlo Viscomi<sup>1,3#</sup>,

<sup>1</sup>Veneto Institute of Molecular Medicine (VIMM), via Orus 2-35129 Padova, Italy

<sup>2</sup>Department of Medical Biochemistry and Cell Biology, University of Gothenburg, Medicinaregatan 9A P.O. Box 440, 41390 Gothenburg, Sweden

<sup>3</sup>Department of Biomedical Sciences, University of Padova, via Ugo Bassi 58/B-35131 Padova, Italy

<sup>4</sup>MRC Mitochondrial Biology Unit, University of Cambridge, Hills Road, CB2 0XY Cambridge, UK

<sup>5</sup>The Mary Lyon Centre, MRC Harwell, Becquerel Ave, Didcot OX11 0RD, Oxfordshire, UK

<sup>6</sup>Institute for Mitochondrial Diseases and Aging, Faculty of Medicine, CECAD Research Center, 50931, Cologne, Germany.

<sup>7</sup>Department of Clinical Neurosciences, University of Cambridge, CB2 2PY Cambridge, UK

<sup>8</sup>Research Programs Unit, Stem Cells and Metabolism, Biomedicum-Helsinki, Haartmaninkatu 8, University of Helsinki, 00290, Helsinki, Finland.

<sup>9</sup>HUSlab, Helsinki University Hospital, University of Helsinki, 00290, Helsinki, Finland.

<sup>10</sup> Department of Neurosciences, University of Padova, via Belzoni 160, 35121 Padova, Italy

<sup>11</sup>Institute for Maternal and Child Health, IRCCS “Burlo Garofolo”, via Istria 61, 34137 Trieste, Italy

<sup>12</sup>School of Basic Medical Sciences, North China University of Science and Technology, Tangshan 063210, China

<sup>13</sup>National Key Laboratory for Development and Utilization of Forest Food Resources, Zhejiang A&F University, Hangzhou 311300, China

\*These authors equally contributed to this work

#Correspondence to:

Carlo Viscomi

Veneto Institute of Molecular Institute (VIMM)

via Orus 2-35129 Padova, Italy

email: [carlo.viscomi@unipd.it](mailto:carlo.viscomi@unipd.it)

OR

Maria Falkenberg

Department of Medical Biochemistry and Cell Biology,

University of Gothenburg,

Medicinaregatan 9A P.O. Box 440,

SE405 30 Gothenburg, Sweden

email: [maria.falkenberg@medkem.gu.se](mailto:maria.falkenberg@medkem.gu.se)

OR

Xuefeng Zhu

Department of Medical Biochemistry and Cell Biology,

University of Gothenburg,

Medicinaregatan 9A P.O. Box 440,

SE405 30 Gothenburg, Sweden

email: [xuefeng.zhu@gu.se](mailto:xuefeng.zhu@gu.se)

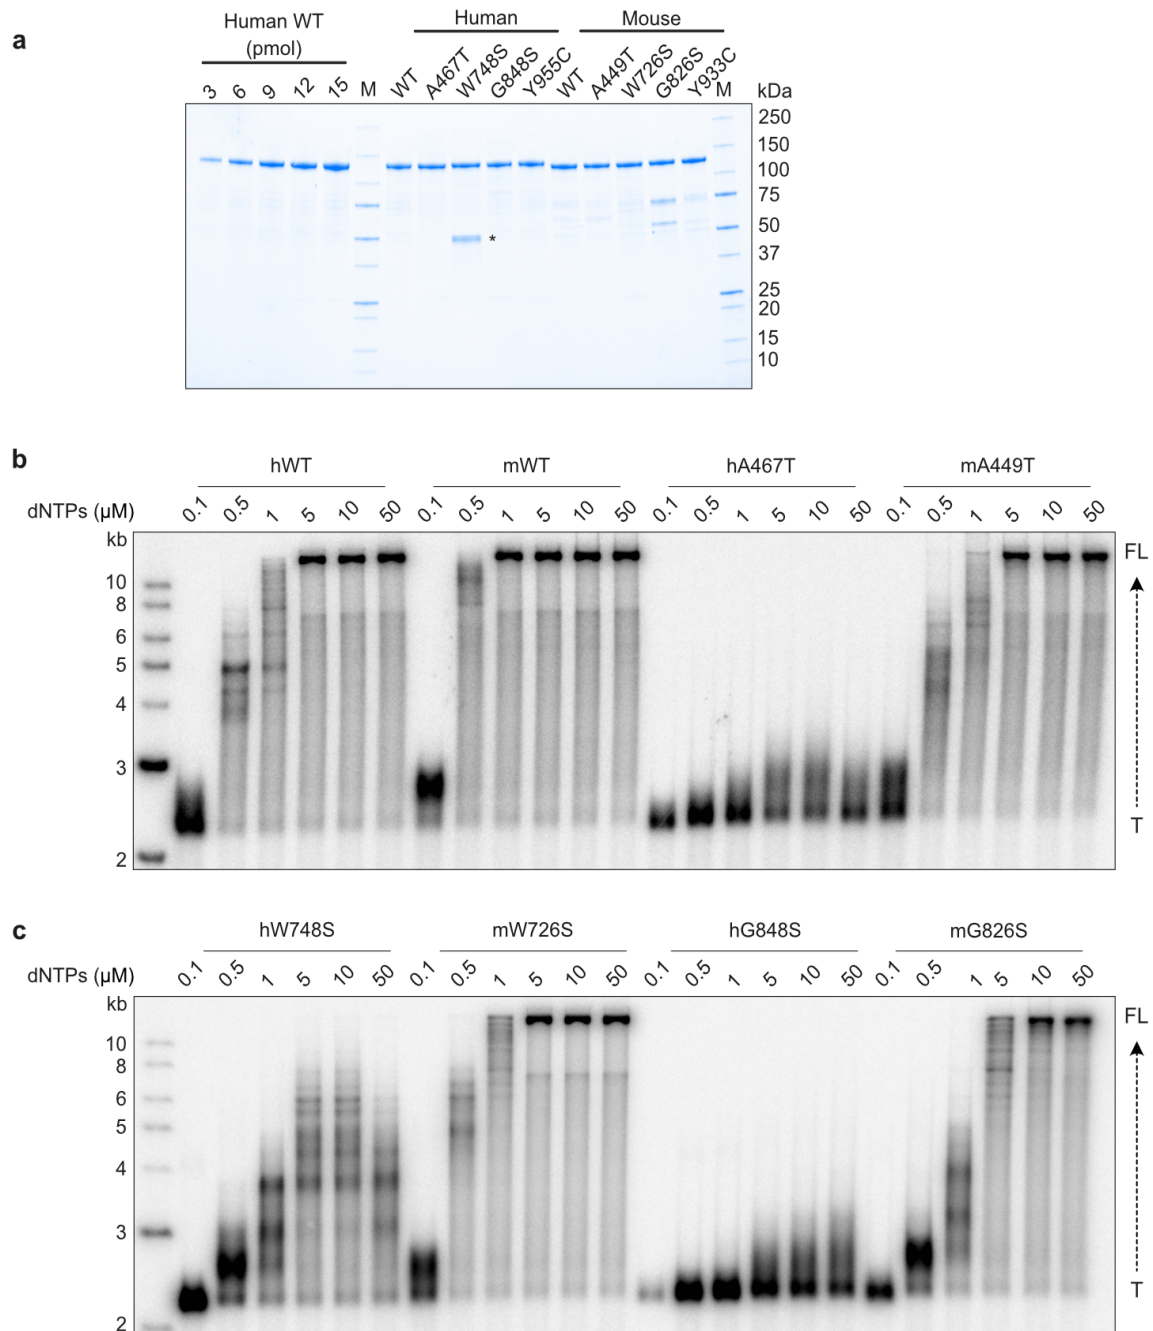

**Supplementary Fig. 1. Mutations impair polymerase activity across all tested dNTP concentrations, demonstrating mtSSB interchangeability.**

**a.** Protein gel (SDS-PAGE) assessing the accuracy of POL $\gamma$  variant quantifications used in enzymatic assays. hPOL $\gamma$ <sup>WT</sup> (3–15 pmol) was included as a standard, with 9 pmol serving as a reference. Equal amounts (9 pmol) of human and mouse POL $\gamma$  variants, based on prior quantification, were loaded for comparison. The asterisk (\*) indicates hPOL $\gamma$ B, which was co-expressed with the human hPOL $\gamma$ <sup>W748S</sup>.  $n = 2$  independent experiments.

**b-c.** Polymerase activity assays were performed as described in Figure 1**b-c**, but using mouse mtSSB instead of human mtSSB. The results showed a similar pattern, confirming that the choice of mtSSB did not significantly affect polymerase activity.  $n = 2$  independent experiments.

Source data are provided as a Source Data file.

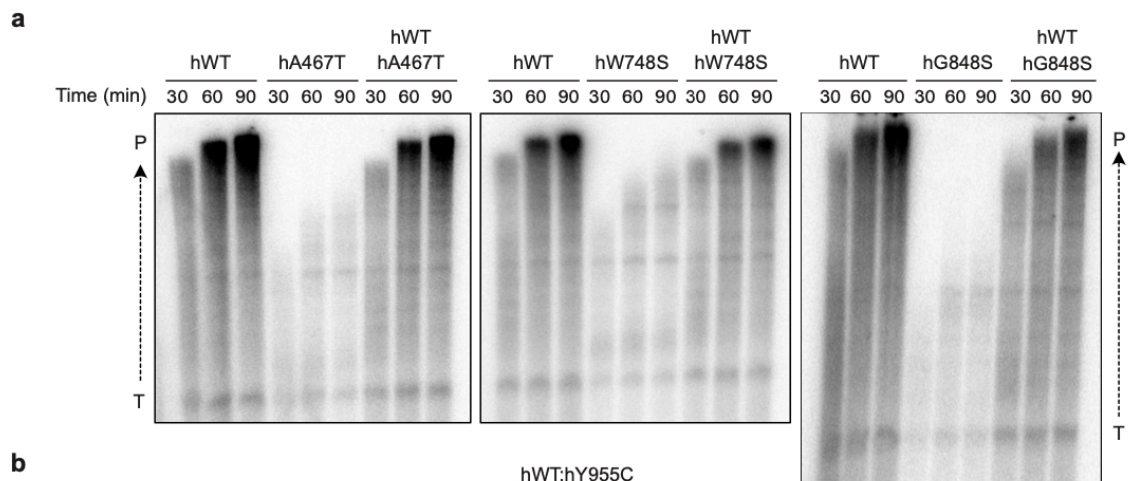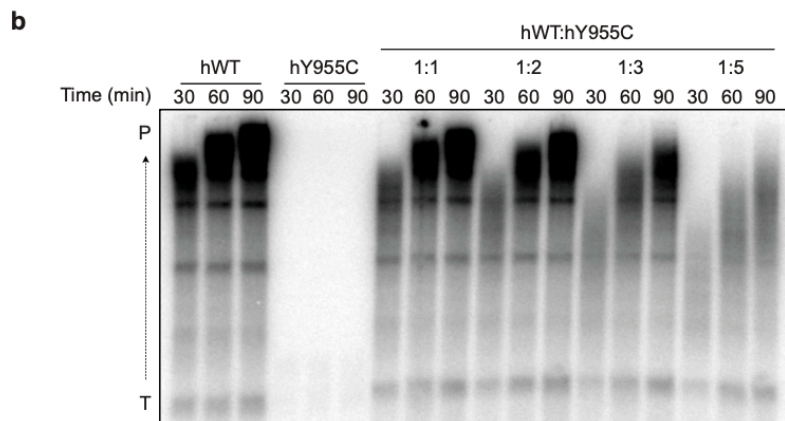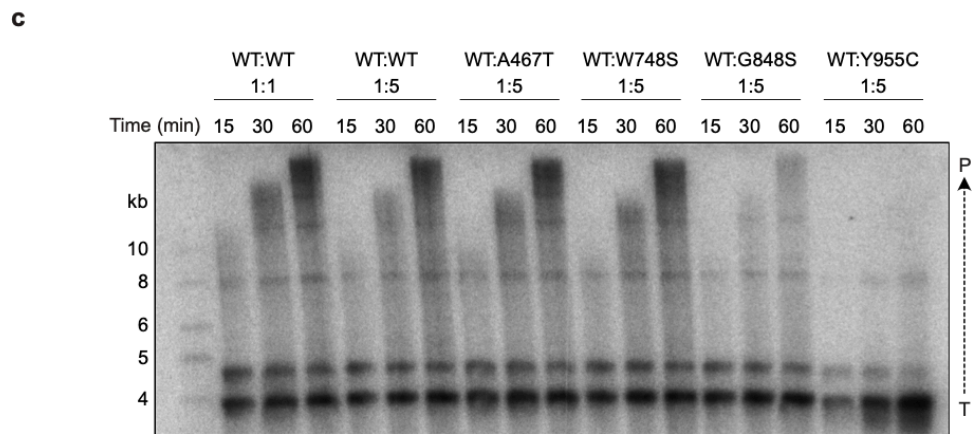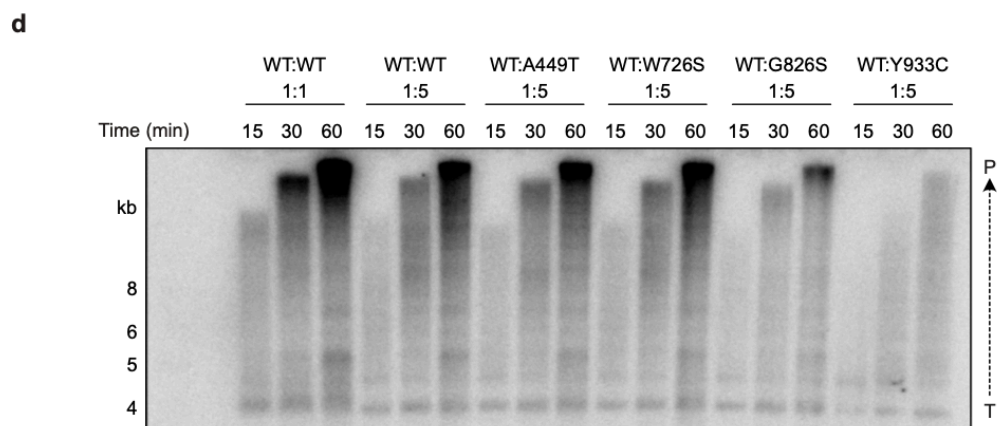

**Supplementary Fig. 2. The recessive mutations affect the mitochondrial human replisome**

**a.** Time-course experiments performed as outlined in Figure 2a show that replication is compromised with all mutant forms of hPOL $\gamma$  variants when run in homozygous state during TWINKLE helicase-dependent rolling-circle DNA replication. hPOL $\gamma^{\text{WT}}$  or mutant hPOL $\gamma$  variants, as indicated, were incubated with TWINKLE, mtSSB, and the rolling-circle template at 37°C for the indicated time points. The polymerase concentration was kept constant; mixed variants were each used at half the concentration to maintain the total enzyme level. DNA synthesis was monitored via radioactive nucleotides incorporation, and the products of increasing length were separated on a 0.8% alkaline agarose gel. Template (T); Products (P).  $n = 2$  independent experiments.

**b.** Time-course experiments, performed as outlined in Figure 2d but with hPOL $\gamma$ , show that the hPOL $\gamma^{\text{Y955C}}$  variant is unable to synthesis DNA efficiently. When combined with hPOL $\gamma^{\text{WT}}$  at a 1:1 ratio, its dominant-negative effect becomes evident and intensifies as the proportion of hPOL $\gamma^{\text{Y955C}}$  increases.  $n = 2$  independent experiments.

**c.** To assess whether recessive mutations exhibit a dominant-negative effect, we performed an additional experiment following the same setup as in **b** but only at the highest ratio (1:5). hPOL $\gamma^{\text{WT}}$  was kept constant, and an excess of either a recessive variant, hPOL $\gamma^{\text{WT}}$ , or the dominant mutant hPOL $\gamma^{\text{Y955C}}$  was added. Adding hPOL $\gamma^{\text{WT}}$ , hPOL $\gamma^{\text{A467T}}$ , or hPOL $\gamma^{\text{W748S}}$  did not reveal any negative effect. However, a weak dominant-negative effect was observed with hPOL $\gamma^{\text{G848S}}$ , although not as severe as that of the dominant hPOL $\gamma^{\text{Y955C}}$  mutant.  $n = 2$  independent experiments.

**d.** The same experiment as in c, showing similar results with mPol $\gamma$  variants.  $n = 2$  independent experiments.

Source data are provided as a Source Data file.

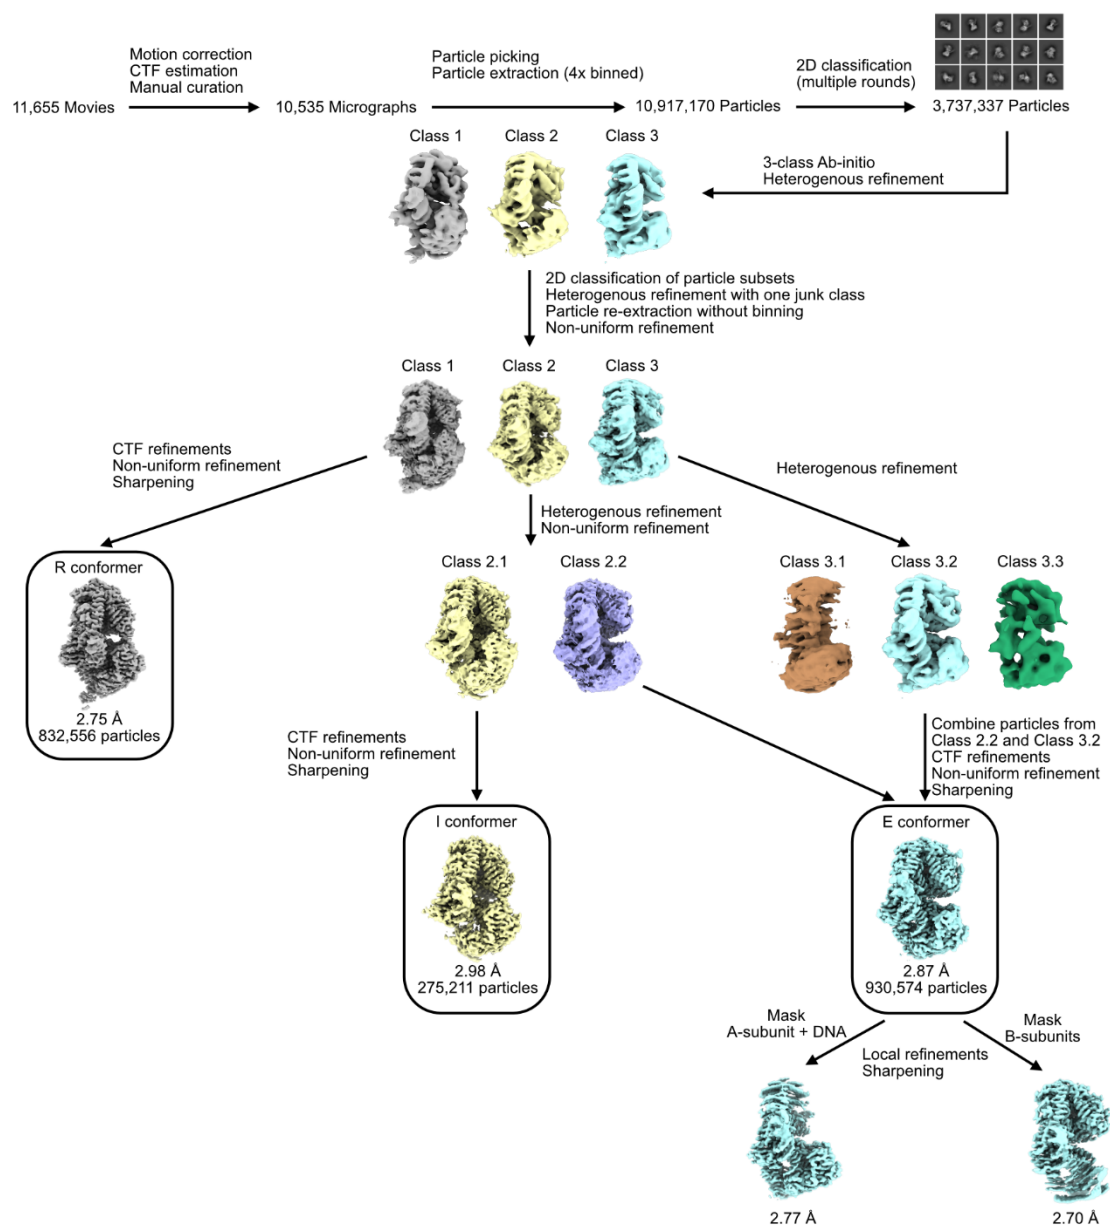

**Supplementary Fig. 3. Cryo-EM processing workflow for mPoly.**

Cryo-EM processing workflow for mPoly. The data were imported into cryoSPARC, which was used for processing and generating the 3D volumes of the three conformers (R, I and E conformers).

**a R conformer**

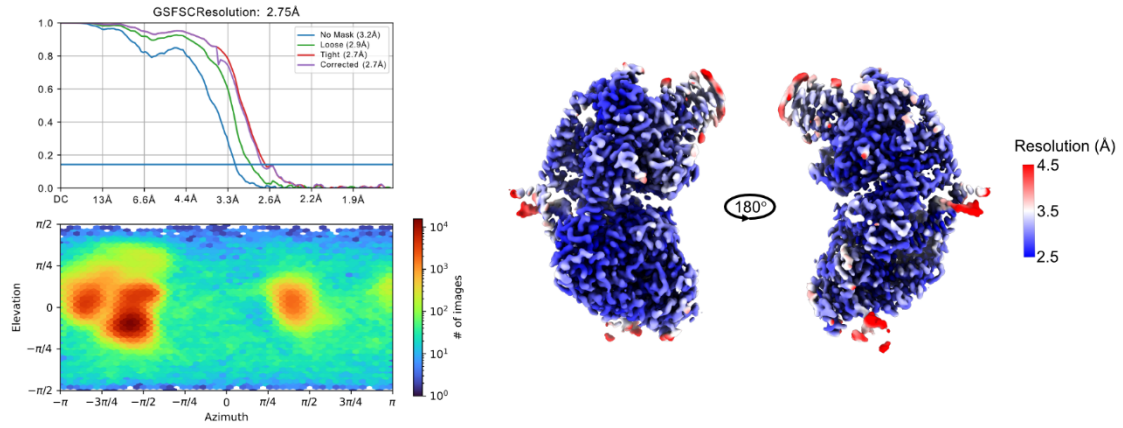

**b I conformer**

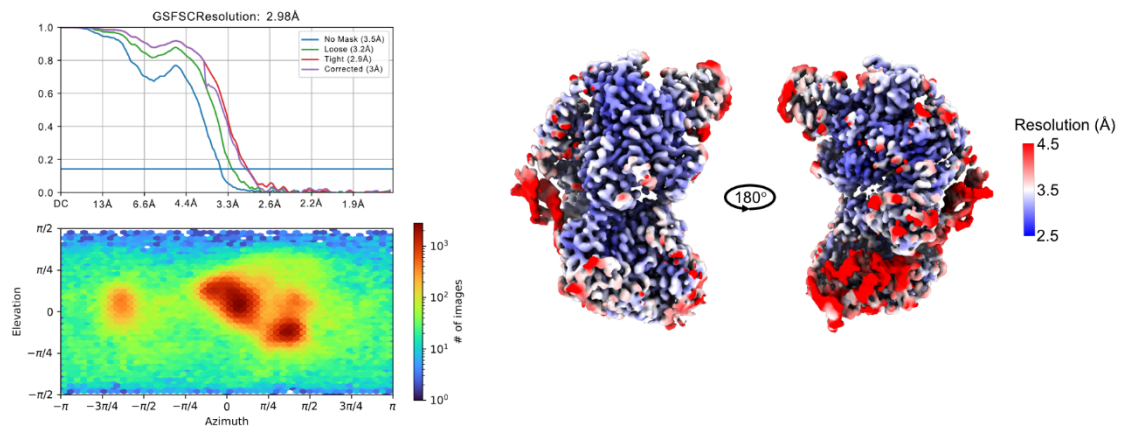

**c E conformer**

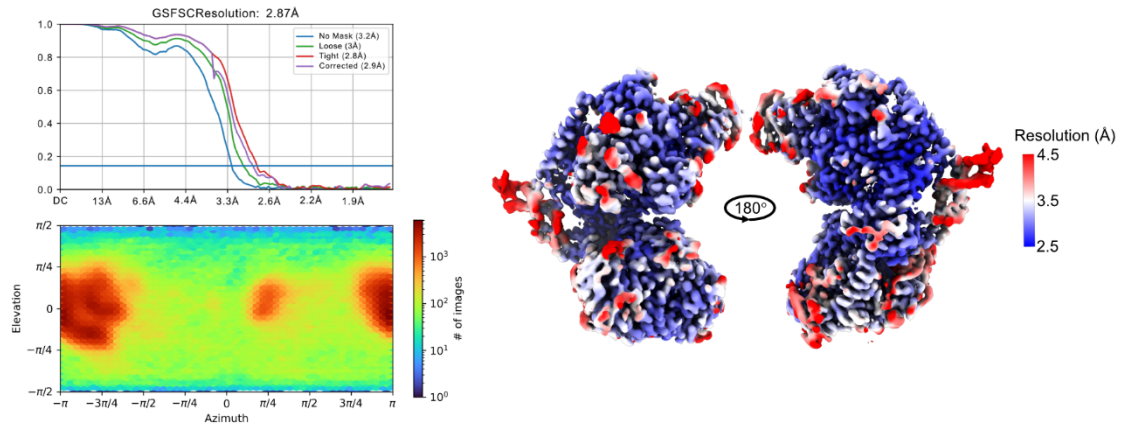

**d**

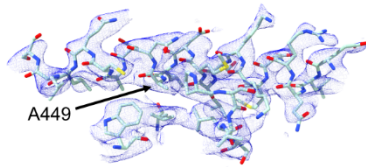

**e**

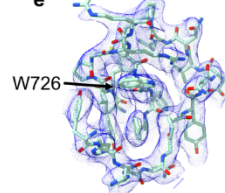

**f**

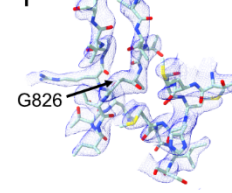

**g**

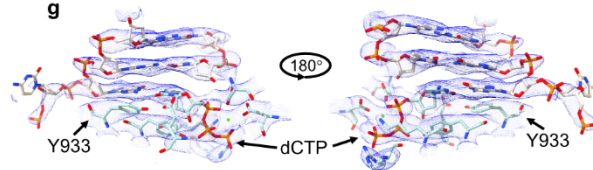

**Supplementary Fig. 4. Assessment of the cryo-EM maps for mPoly.**

FSC resolution (FSC threshold = 0.143) determined during the final non-uniform refinement in cryoSPARC, the orientation distribution plot and local resolution estimation (FSC threshold = 0.5) for; **a**, R conformer; **b**, I conformer; **c**, E conformer.

**d–g**. The model of the mouse R conformer structure at the sites of residues of interest, with map densities displayed as mesh.

**d**. A449 region. The map is contoured at a level of 6.2.

**e**. W726 region. The map is contoured at a level of 3.0.

**f**. G826 region. The map is contoured at a level of 10.0.

**g**. Y933 and active site region. The map is contoured at a level of 7.0.

# POL $\gamma$ intermediate conformation

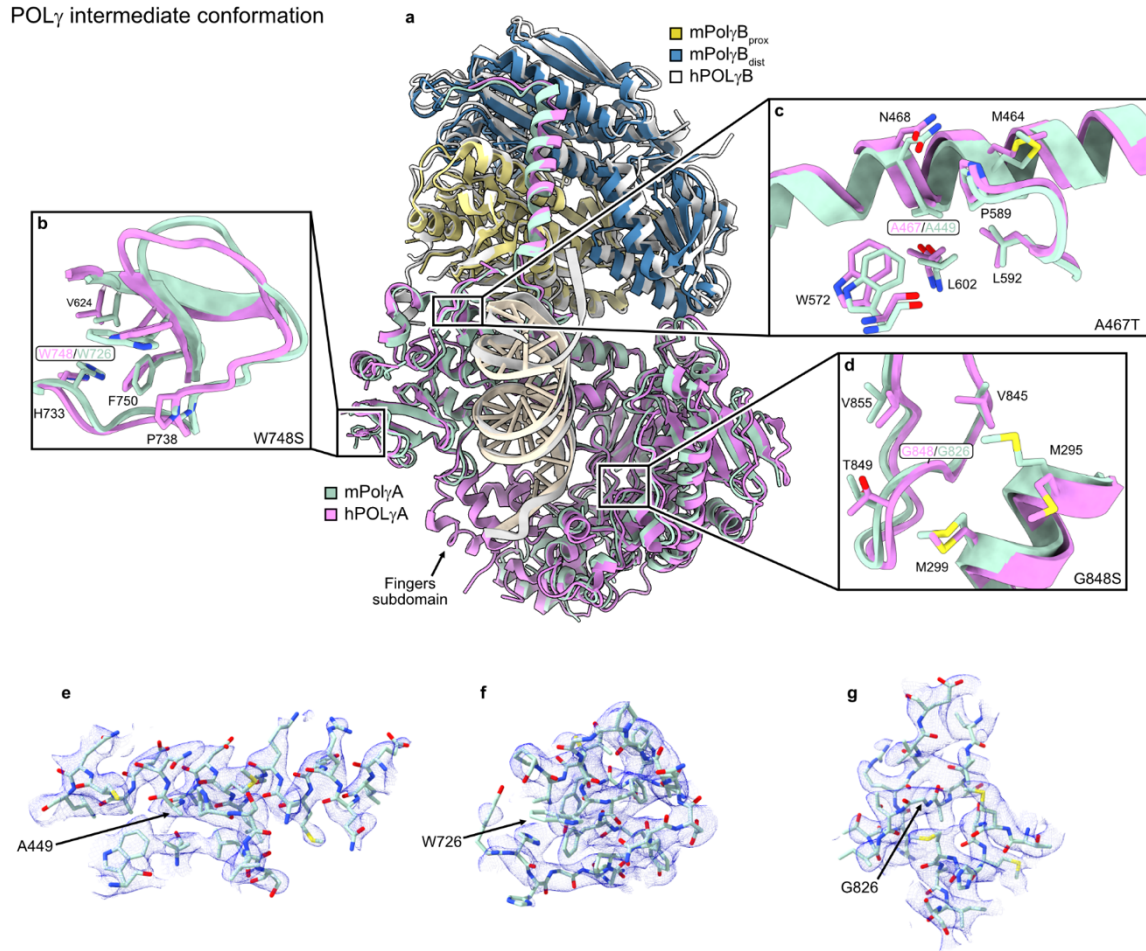

## Supplementary Fig. 5. Structural comparison of the hPOL $\gamma$ and mPol $\gamma$ intermediate conformers.

**a.** Overview of overlaid hPOL $\gamma$  (PDB ID: 8D3R) and mPol $\gamma$  intermediate conformers. The position of the hPOL $\gamma$ A (magenta) and mPol $\gamma$ A (green) subunits are near identical, which also applies for the position of the DNA (grey and beige for human and mouse structures, respectively). In the POL $\gamma$ B region, there is a small shift between in the distal mPol $\gamma$ B (blue) and distal hPOL $\gamma$ B (white), while the proximal mPol $\gamma$ B (yellow) is still aligned to the proximal hPOL $\gamma$ B (white).

**b.** Closeup of the A467/A449 position and surrounding residues.

**c.** Closeup of the W748/W726 position and surrounding residues.

**d.** Closeup of the G848/G826 position and surrounding residues. In panels b–d, the surrounding residues are numbered according to the human sequence.

**e–g.** The model of the mouse I conformer structure at the sites of residues of interest, with map densities displayed as mesh.

- e. A449 region. The map is contoured at a level of 6.5.
- f. W726 region. The map is contoured at a level of 3.5.
- g. G826 region. The map is contoured at a level of 6.0.

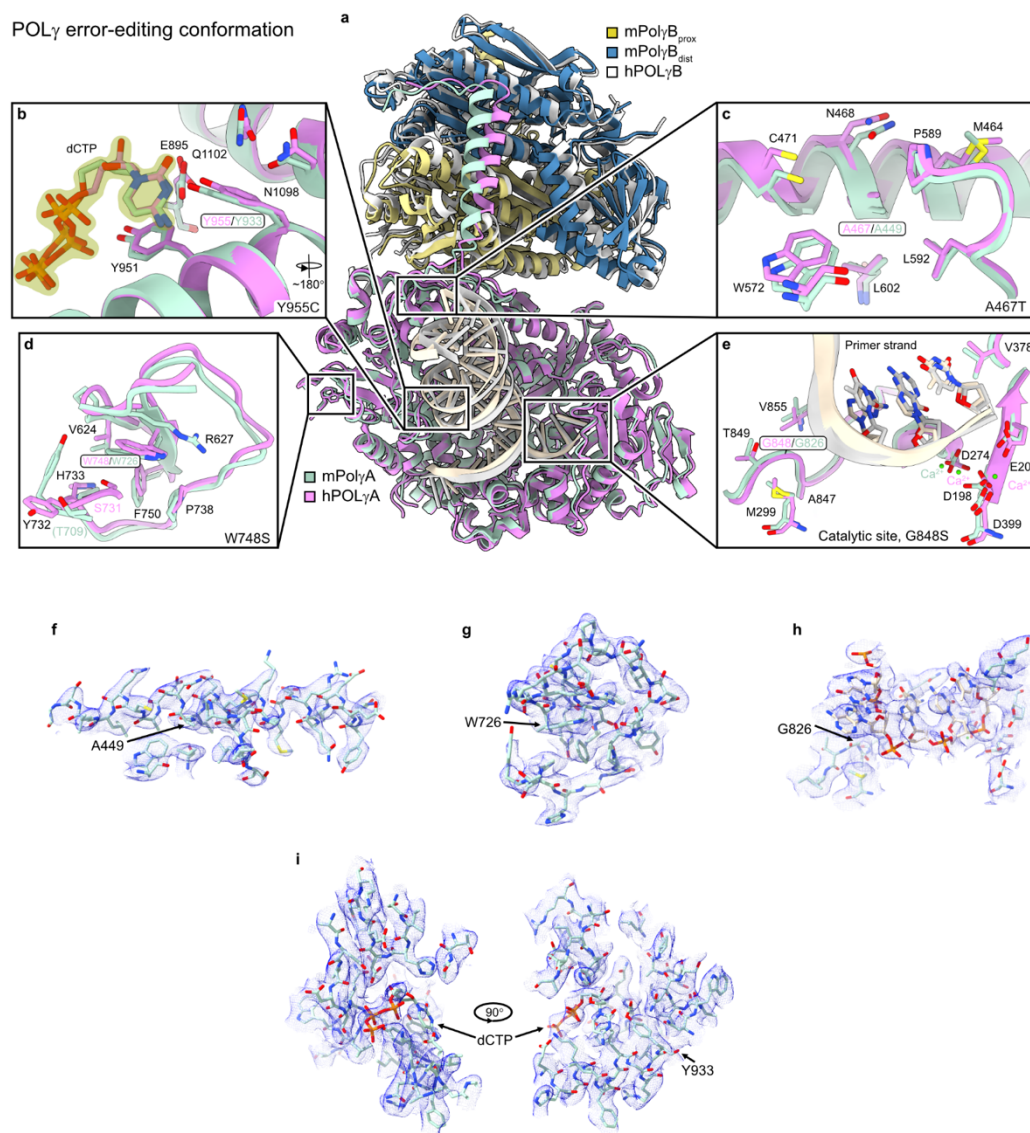

**Supplementary Fig. 6. Structural comparison of the hPOL $\gamma$  and mPol $\gamma$  error-editing conformers.**

**a.** Overview of overlaid hPOL $\gamma$  (PDB ID: 8D42) and mPol $\gamma$  error-editing conformers. The position of the hPOL $\gamma$ A (magenta) and mPol $\gamma$ A (green) subunits are near identical, which also applies for the position of the DNA (grey and beige for human and mouse structures, respectively). However, the L-helix and POL $\gamma$ B are in different positions, where hPOL $\gamma$ B (white) is shifted compared to both the distal mPol $\gamma$ B (blue) and proximal mPol $\gamma$ B (yellow).

**b.** Closeup of the Y955/Y933 residues and the surrounding residues. The incoming nucleotide (dCTP) is highlighted in yellow.

**c.** Closeup of the A467/A449 position and surrounding residues. The main difference is that another rotamer has been used for Y732 sidechain in the human model, however, while

reviewing of the published map (EMD-27172) of the human version, it is unclear which rotamer is the correct one. The discrepancy may therefore be a modeling error.

**d.** Closeup of the W748/W726 position and surrounding residues.

**e.** Closeup of the catalytic site (EXO) and G848/G826 position and surrounding residues. In panels **b–e**, the surrounding residues are numbered according to the human sequence.

**f–i.** The model of the mouse E conformer structure at the sites of residues of interest, with map densities displayed as mesh.

**f.** A449 region. The map is contoured at a level of 10.2.

**g.** W726 region. The map is contoured at a level of 3.4.

**h.** G826 region and exonuclease site. The map is contoured at a level of 2.8.

**i.** Y933 and active site. The map is contoured at a level of 3.5.

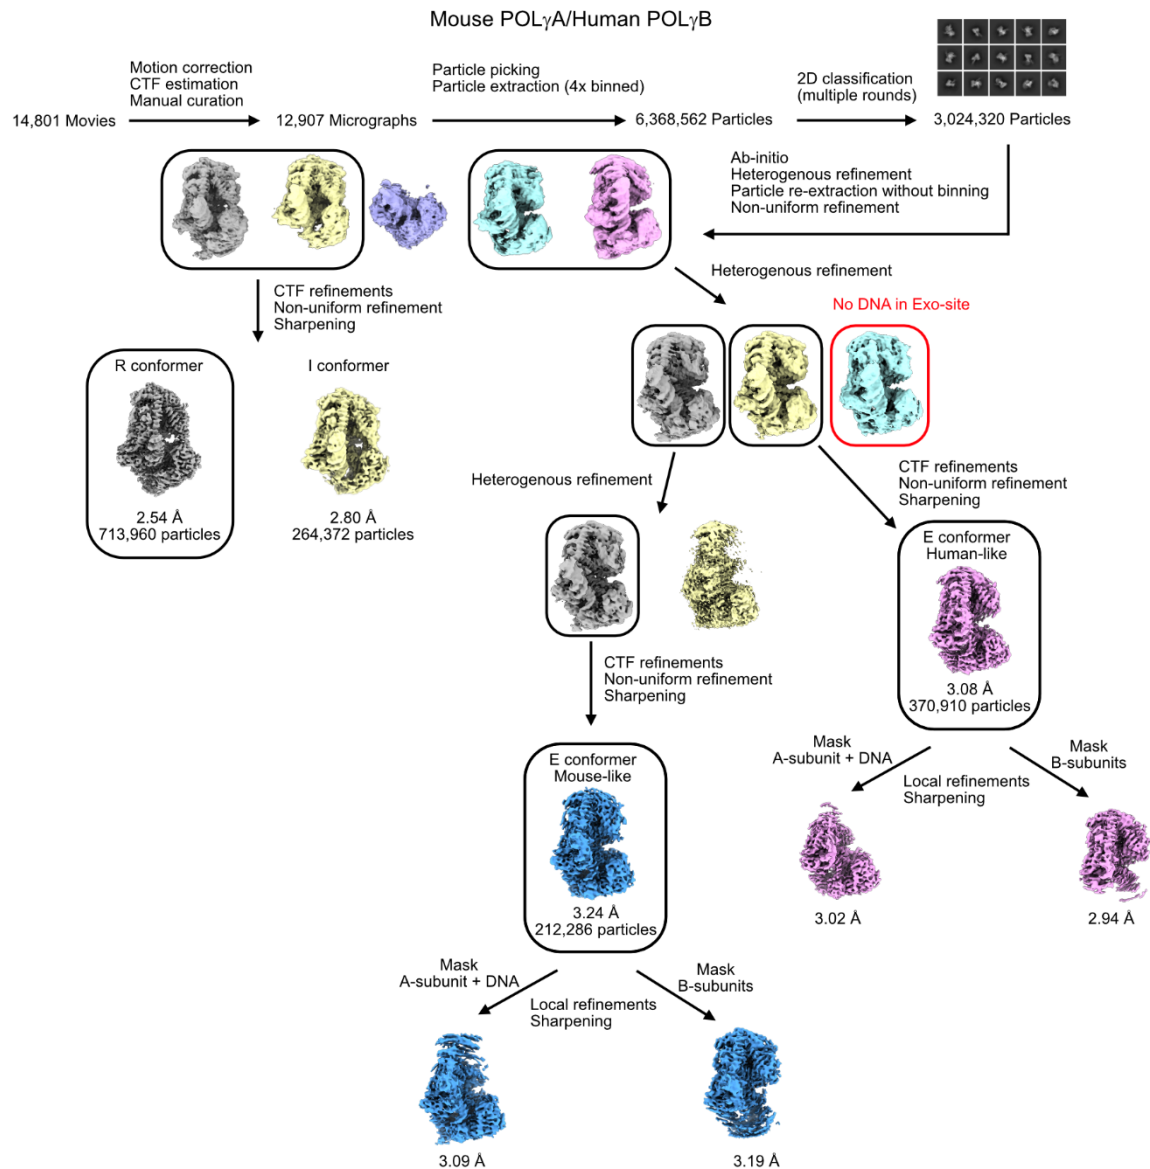

**Supplementary Fig. 7. Cryo-EM processing workflow for the chimeric mPolyA/hPOL $\gamma$ B complex.**

The data were imported into cryoSPARC, which was used for processing and generating the 3D volumes. Both R and I conformers were observed as well as two E conformers; one mouse-like and one human-like. The R conformer and the two E conformers were used for modelling.

# Mouse POL $\gamma$ A/Human POL $\gamma$ B

## **a** R conformer

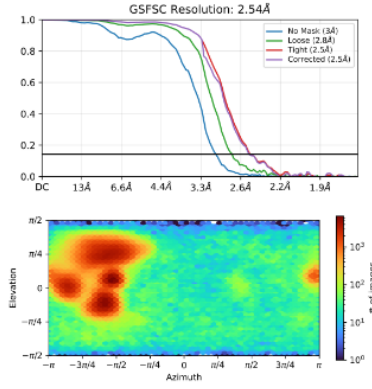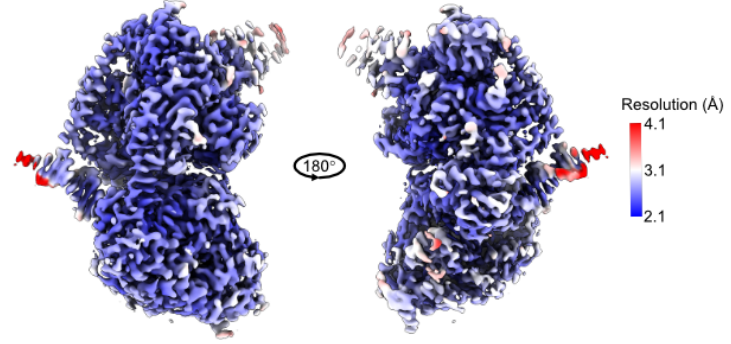

## **b** E conformer (human-like)

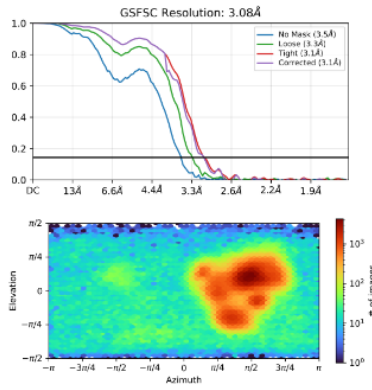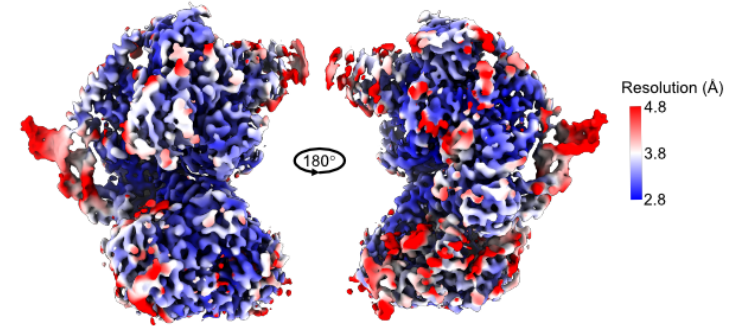

## **c** E conformer (mouse-like)

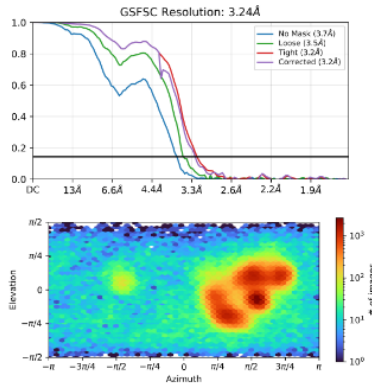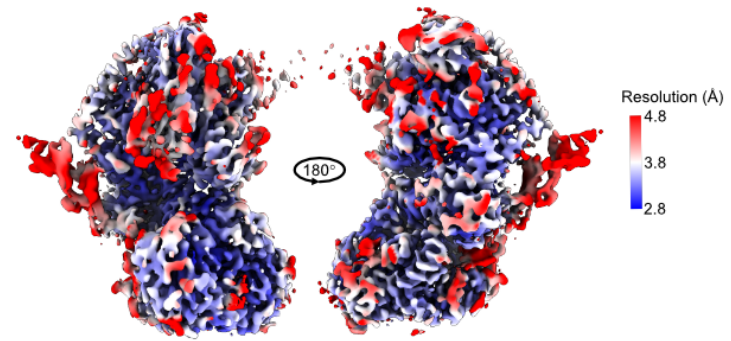

**Supplementary Fig. 8. Assessment of the cryo-EM maps for the chimeric mPolyA/hPOL $\gamma$ B complex.**

FSC resolution (FSC threshold = 0.143) determined during the final non-uniform refinement in cryoSPARC, the orientation distribution plot and local resolution estimation (FSC threshold = 0.5) for; **a**, R conformer; **b**, E conformer (human-like); **c**, E conformer (mouse-like).

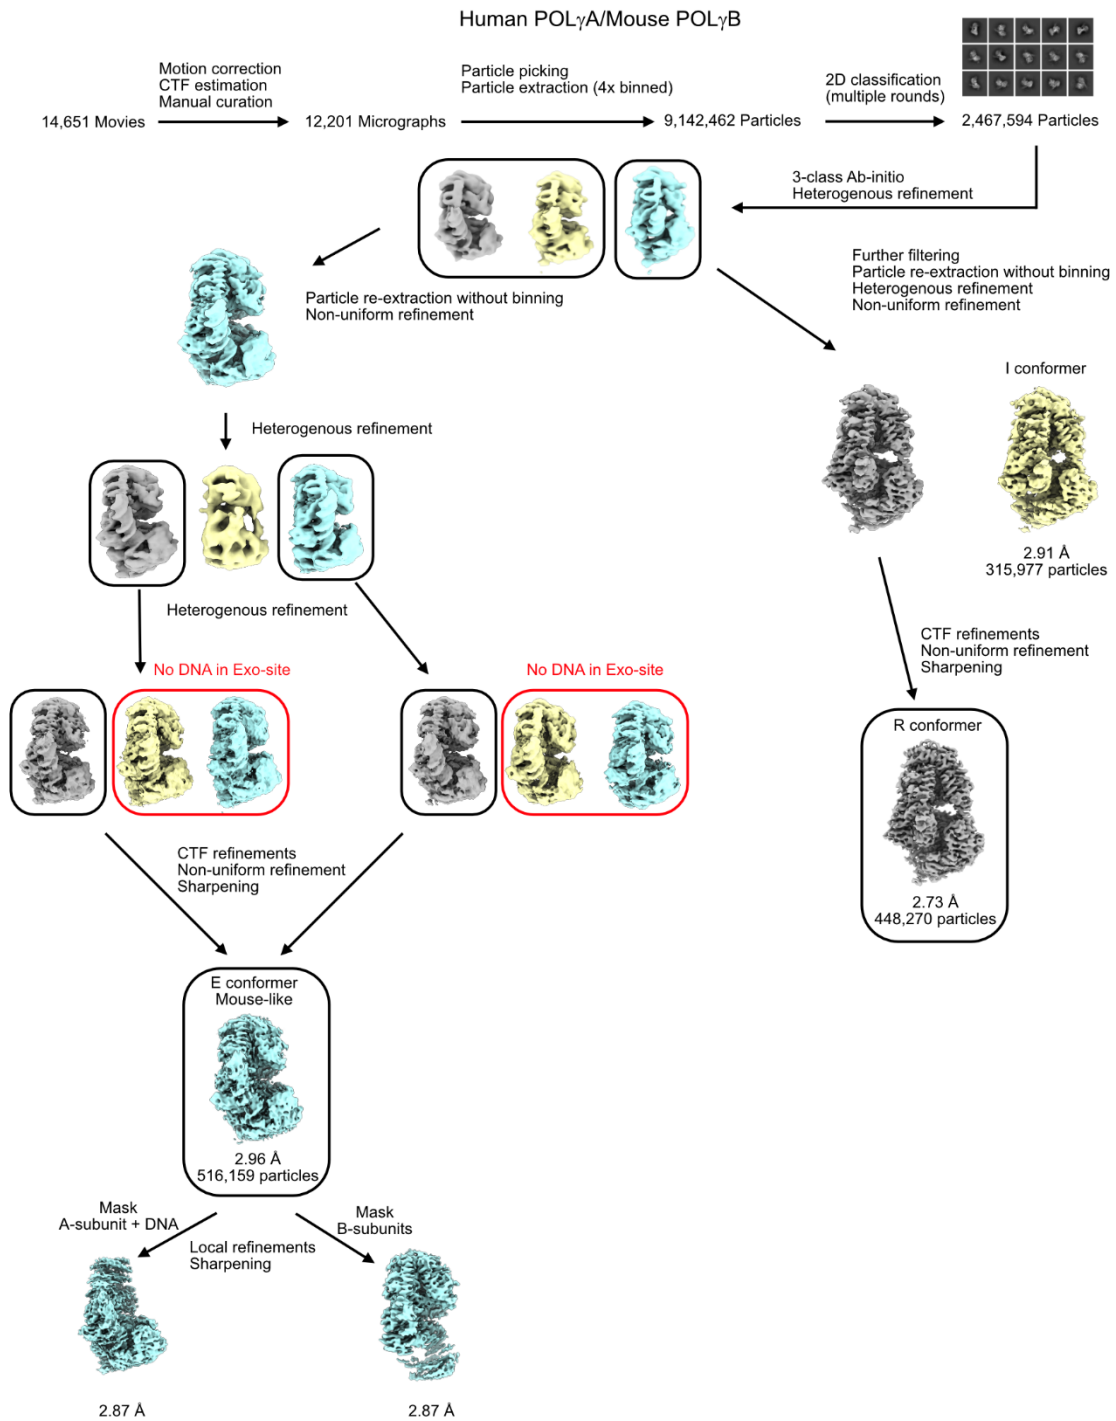

**Supplementary Fig. 9. Cryo-EM processing workflow for the chimeric hPOL $\gamma$ A/mPol $\gamma$ B complex.**

The data were imported into cryoSPARC, which was used for processing and generating the 3D volumes. Both R and I conformers were observed as well as one E conformer (mouse-like). The R conformer and the E conformers were used for modelling.

# Human POL $\gamma$ A/Mouse POL $\gamma$ B

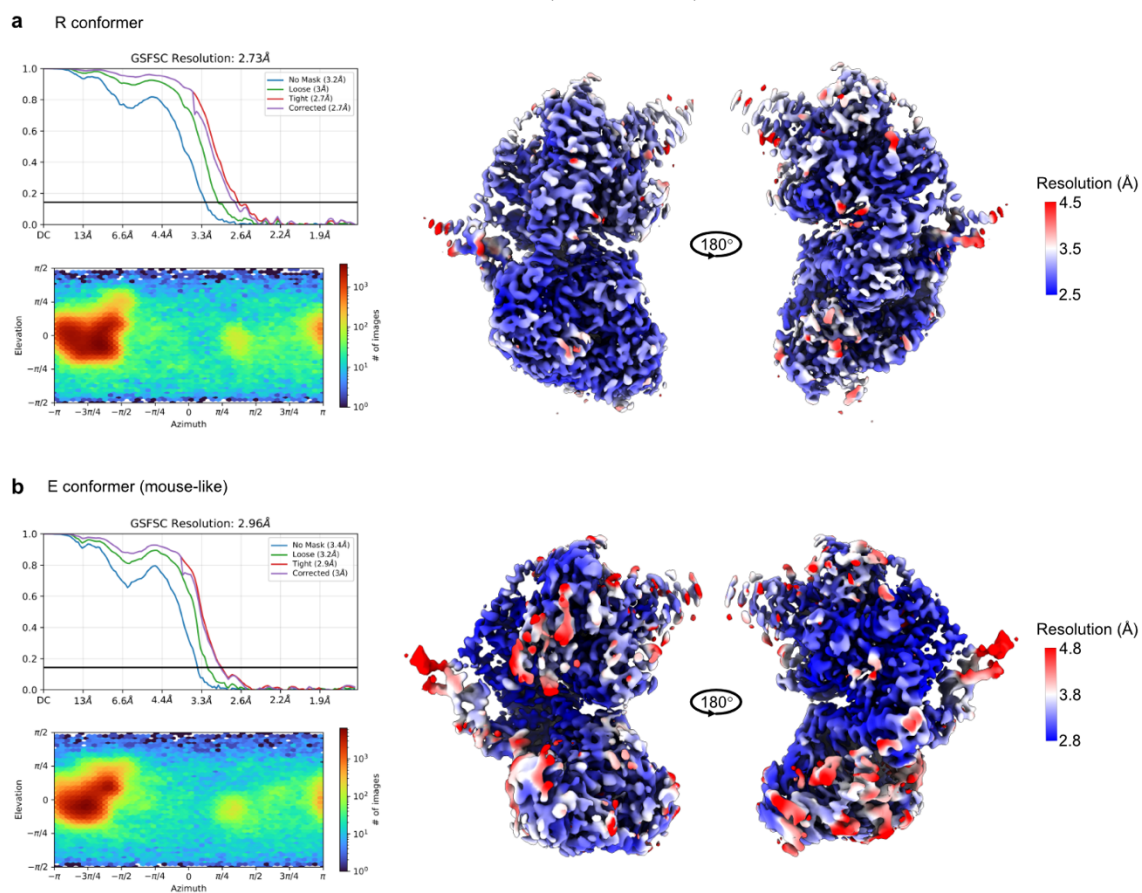

**Supplementary Fig. 10. Assessment of the cryo-EM maps for the chimeric hPOL $\gamma$ A/mPolyB complex.**

FSC resolution (FSC threshold = 0.143) determined during the final non-uniform refinement in cryoSPARC, the orientation distribution plot and local resolution estimation (FSC threshold = 0.5) for; **a**, R conformer; **b**, E conformer (mouse-like).

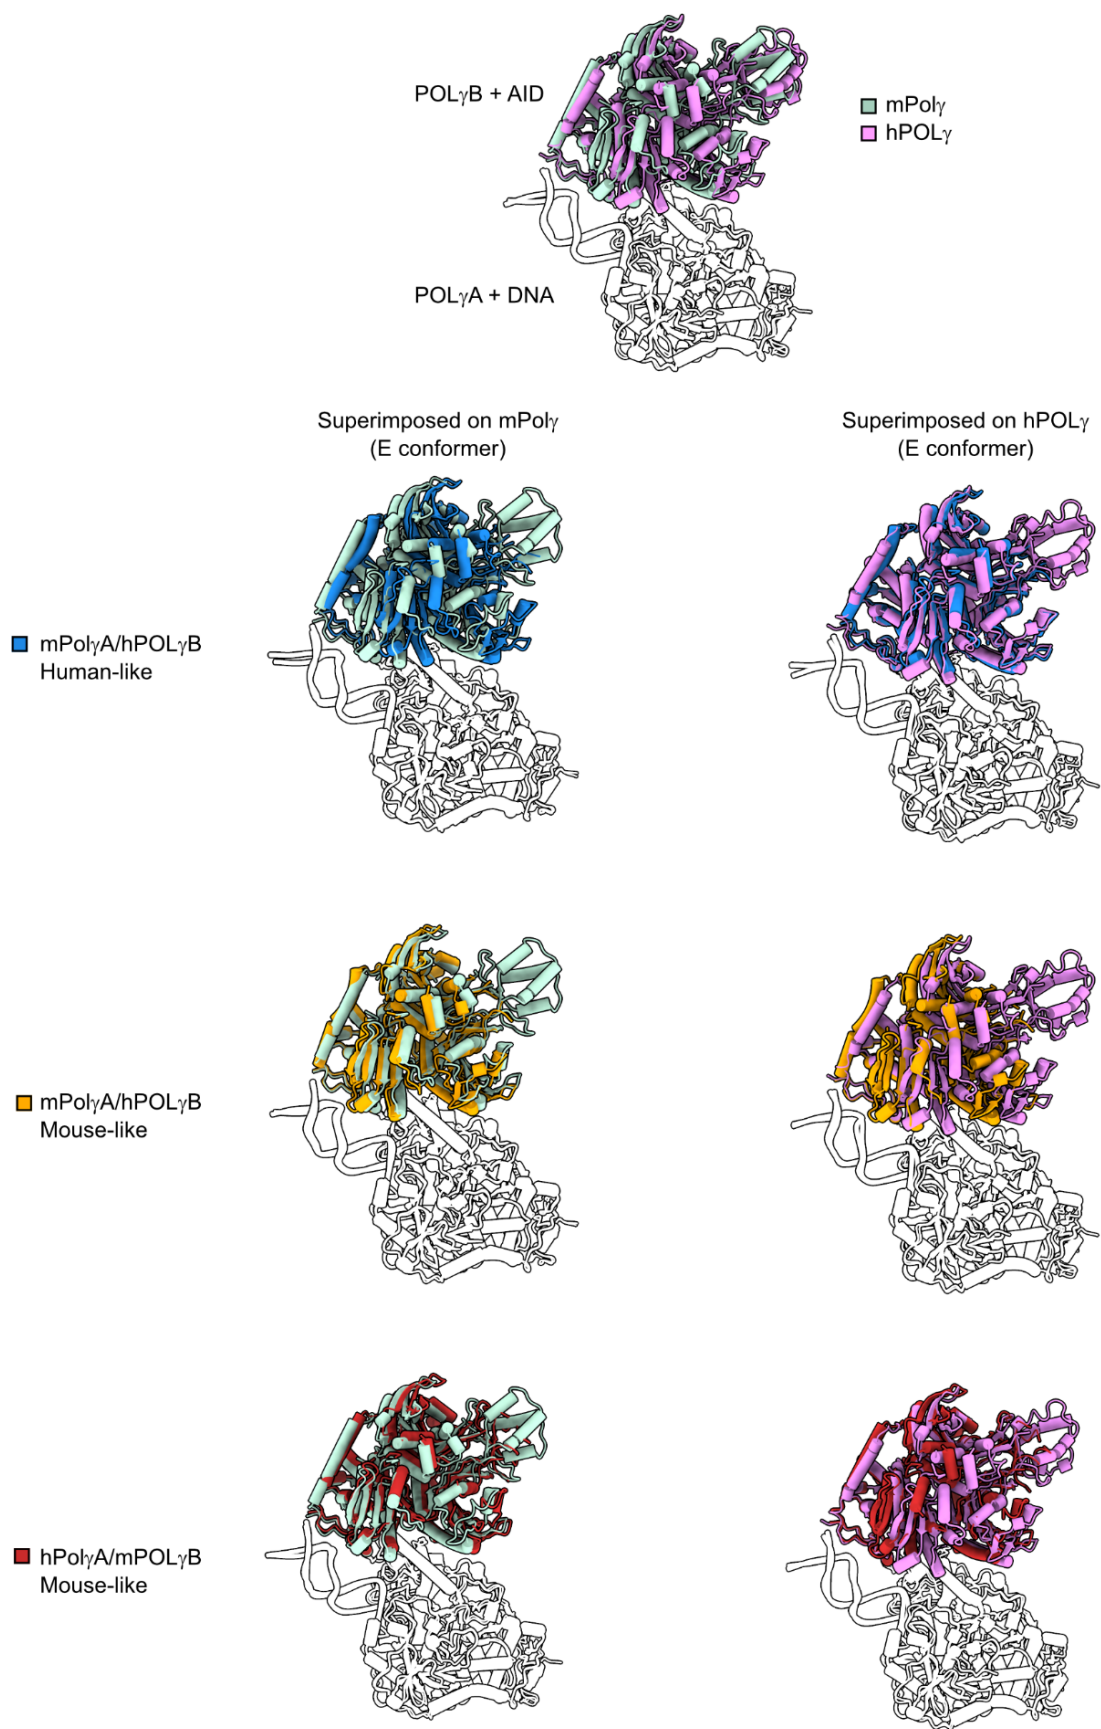

**Supplementary Fig. 11. Comparison between mPol $\gamma$  or hPol $\gamma$  and chimeric POL $\gamma$  complexes.**

The E conformers of chimeric POL $\gamma$  (mAhB or hAmB) were superimposed on mPol $\gamma$  or hPol $\gamma$  for comparison. POL $\gamma$ A and DNA are outlined while POL $\gamma$ B and the AID are colored. There are only small differences in the catalytic subunit, however, the position of the POL $\gamma$ B subunits vary. In the mAhB chimera, both human-like (blue) and mouse-like (orange) conformations can be observed. In the hAmB chimera, only the mouse-like (red) conformation is observed. For hAmB chimera, the DNA in the exo-site were relatively poor compared to the mAhB variants, indicating more flexibility or less stability in this conformation.

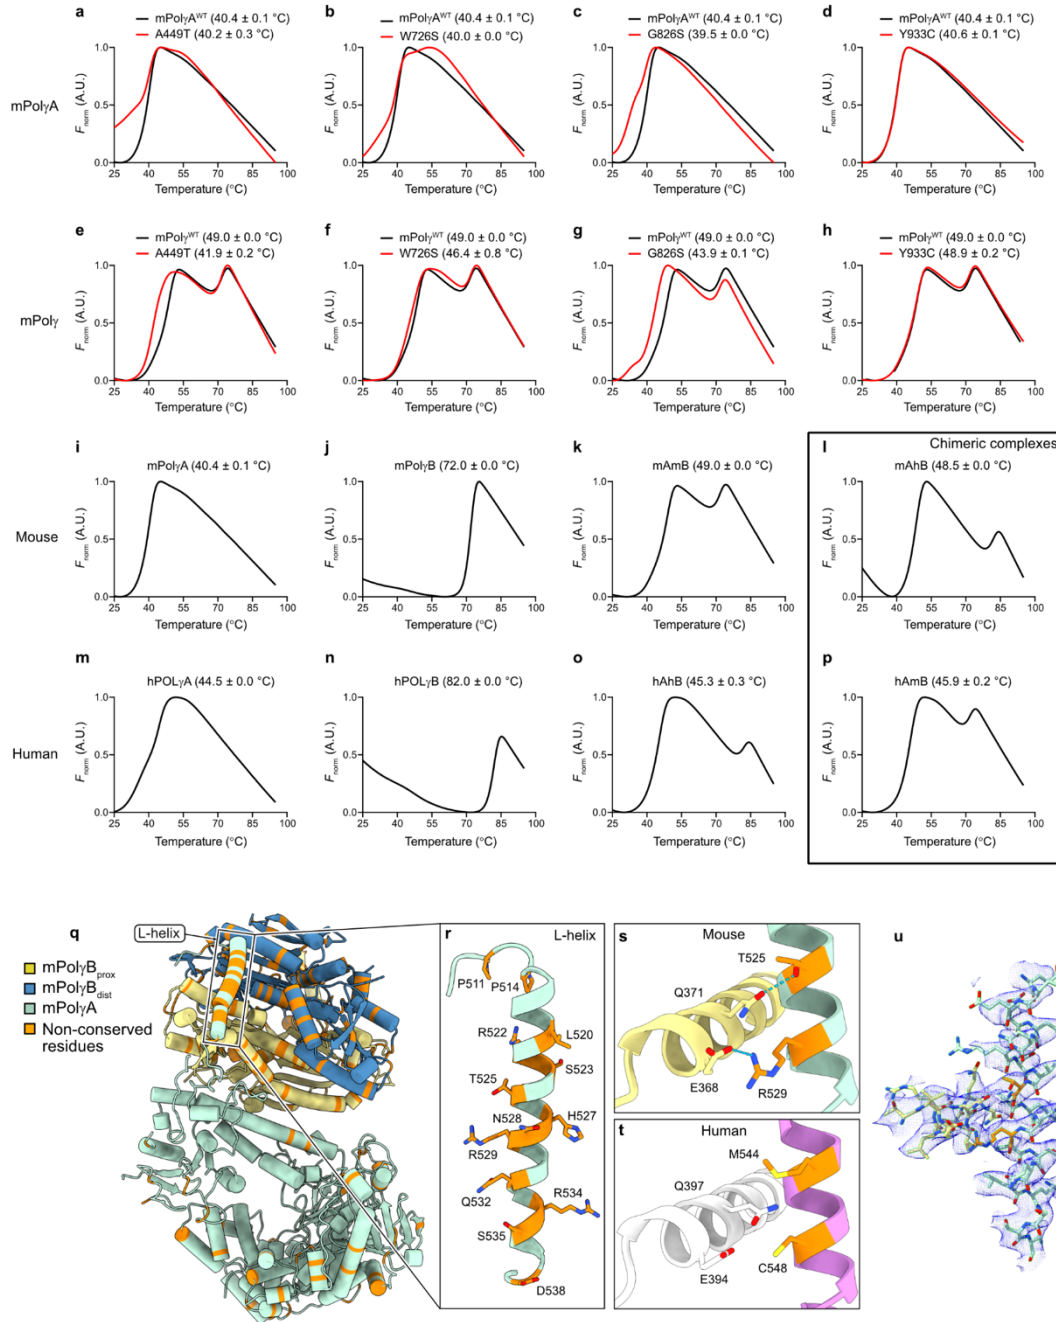

**Supplementary Fig. 12. Thermal stability of mPoly<sup>WT</sup> and mutants**

Representative plots of differential scanning fluorimetry. Values are presented as normalized fluorescence ( $F_{\text{norm}}$ ) in arbitrary units (A.U.). The melting temperature ( $T_m$ ) is given as mean ± s.d.,  $n = 3$  independent experiments for PolyA in all panels except in **j** and **n** where  $T_m$  is given for PolyB.

**a–d.** Melting curves for mPolyA<sup>A449T</sup>, mPolyA<sup>W726S</sup>, mPolyA<sup>G826S</sup>, mPolyA<sup>Y933C</sup> and mPolyA<sup>WT</sup>.

**e–h.** Melting curves for mPol $\gamma$ A<sup>A449T</sup>, mPol $\gamma$ A<sup>W726S</sup>, mPol $\gamma$ A<sup>G826S</sup>, mPol $\gamma$ A<sup>Y933C</sup> and mPol $\gamma$ A<sup>WT</sup> in complex with mPol $\gamma$ B.

**i–l.** Melting curves for mPol $\gamma$ A<sup>WT</sup>, mPol $\gamma$ B<sup>WT</sup>, mPol $\gamma$ <sup>WT</sup> and the chimeric mPol $\gamma$ A<sup>WT</sup>/hPol $\gamma$ B<sup>WT</sup> (mA<sub>h</sub>B) complex. The melting curve in **i** was also used in panels **a–d**. The melting curve in **k** was also used in panels **e–h**.

**m–p.** Melting curves for hPol $\gamma$ A<sup>WT</sup>, hPol $\gamma$ B<sup>WT</sup>, hPol $\gamma$ <sup>WT</sup> and the chimeric hPol $\gamma$ A<sup>WT</sup>/mPol $\gamma$ B<sup>WT</sup> (hA<sub>m</sub>B) complex.

**q.** Adapted version of Fig 4a of the mPol $\gamma$  E conformer (DNA omitted). Non-conserved residues between human and mouse are shown in orange in both POL $\gamma$ A and POL $\gamma$ B. Many non-conserved residues are clustered in POL $\gamma$ B and the L-helix.

**r.** Closeup of the L-helix with residues displayed as sticks.

**s–t.** The mPol $\gamma$ A L-helix can form electrostatic interactions with the proximal mPol $\gamma$ B subunit via the T525 and R529 residues. However, in the hPol $\gamma$ A L-helix, these residues are substituted to M544 and C548, which lacks the ability to form strong interactions with the proximal hPol $\gamma$ B subunit.

**u.** The helices in **s** displayed as sticks with the map density displayed as mesh. The map is contoured at a level of 4.0.

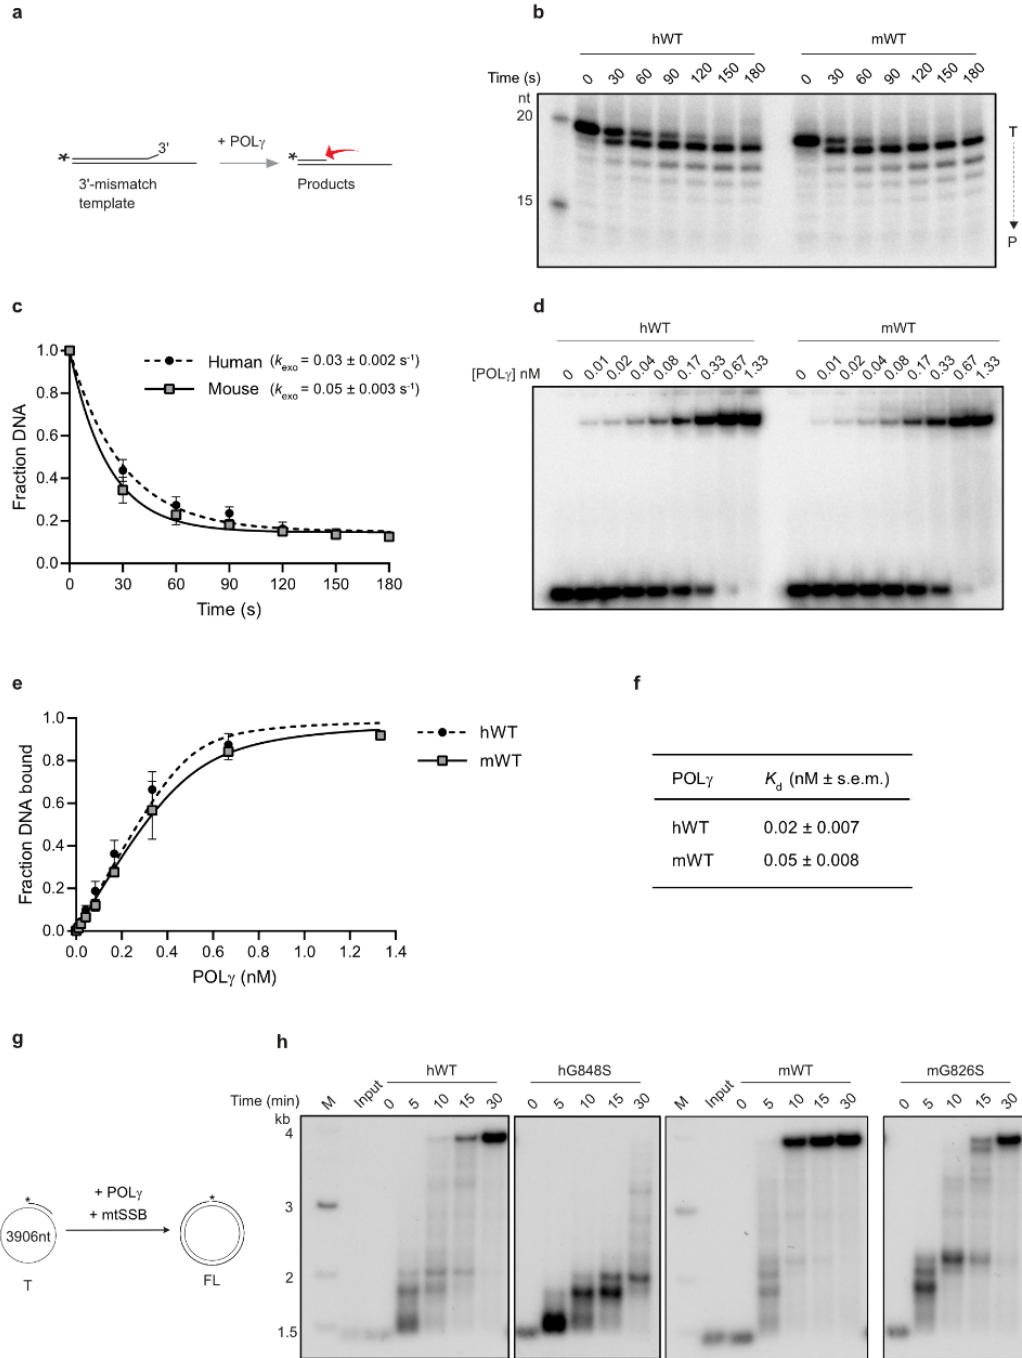

### Supplementary Fig. 13. Comparable exonuclease activity between human and mouse Poly holoenzymes.

**a.** Schematic representation of the exonuclease assay used to investigate the effects of various mutant POL $\gamma$  proteins on proofreading activity using a 3'-mismatch template.

**b.** Time-course experiments reveal that hPOL $\gamma^{\text{WT}}$  and mPOL $\gamma^{\text{WT}}$  efficiently remove a mismatch at the 3'-end. The reactions were incubated with the mismatch-template at 37 °C in the absence of dNTPs and for the indicated times. The products were separated on 10% urea-PAGE

sequencing gels. The positions of products (P) and the radioactively labeled mismatch template (T) are indicated.  $n = 3$  independent experiments.

**c.** The fraction non-degraded 20-mer was quantified and plotted versus time to visualize the DNA degradation. Data are presented as the mean  $\pm$  s.d.,  $n = 3$  independent experiments. The data was fitted to an exponential decay equation to determine the rate constants ( $k_{\text{exo}}$ ) for human and mouse. Values are given with errors in s.e.m.

**d.** The DNA binding activity of a stalled elongation complex of hPOL $\gamma^{\text{WT}}$  and mPOL $\gamma^{\text{WT}}$  was analyzed by EMSA using a primed DNA template. Source data are provided with this paper.

**e.** The binding ratio was plotted against polymerase complex concentration. Data are presented as the mean  $\pm$  s.d.,  $n = 2$  independent experiments, and the binding curves were fitted to a non-linear quadratic equation to determine the dissociation constants,  $K_d$ .

**f.** Summary of the determined  $K_d$  values, with errors given as s.e.m.

**g-h** Time-course experiments, performed as outlined in Fig. 1a but with a single-stranded DNA template of 3900 nt instead of 7249 nt, reveal that the replication rate is higher with the mPOL $\gamma$  variants than with the hPOL $\gamma$  variants. POL $\gamma$  and mtSSB were incubated with a primed, single-stranded DNA template and 10  $\mu\text{M}$  dNTP at 37 °C for the indicated times and analyzed on a 0.8% native agarose gel. The positions of the full-length (FL) product and the radioactively labeled primer template (T) are indicated.  $n = 2$  independent experiments.

Source data are provided as a Source Data file.

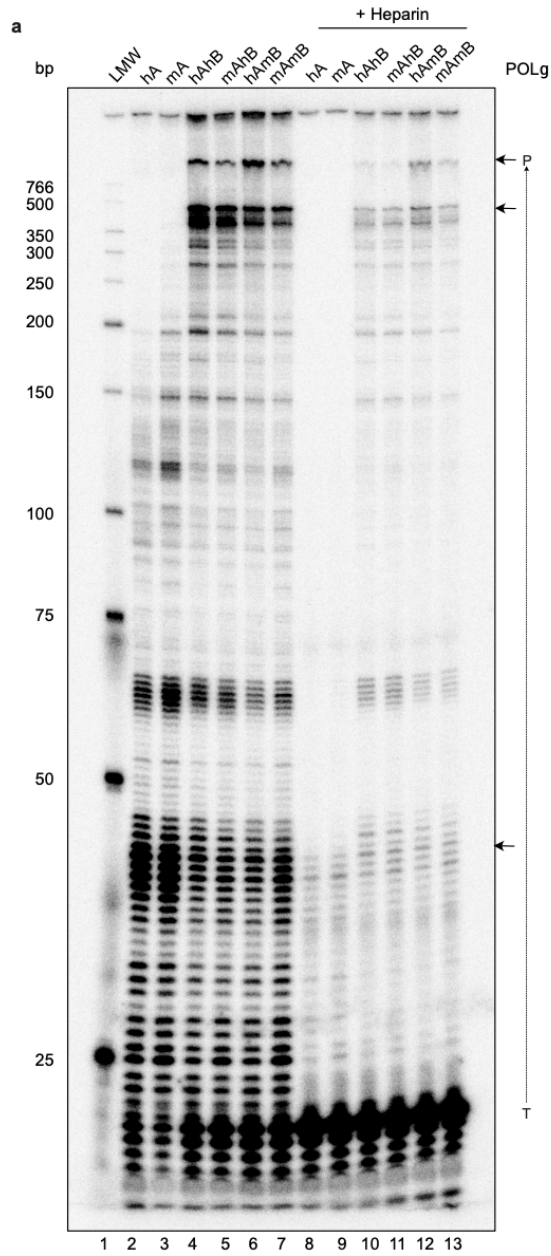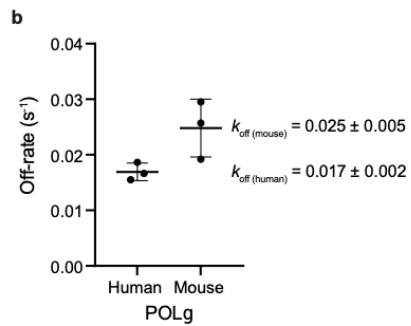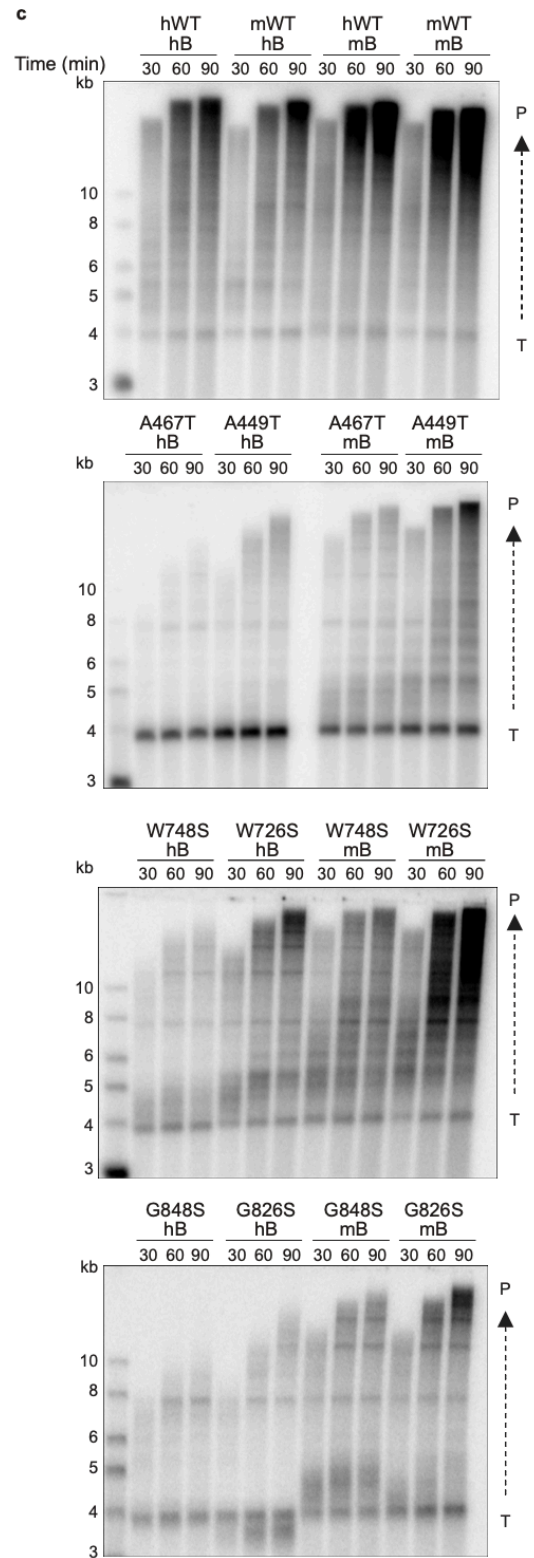

**Supplementary Fig. 14. Comparable processivity of human and mouse pol $\gamma$  holoenzymes.**

**a.** To measure processivity, the indicated POL $\gamma$  variants were pre-incubated on ice with a primed, single-stranded DNA template. DNA synthesis was initiated by adding either dNTP alone or dNTP and heparin, and the reactions were allowed to proceed for 5 minutes at 37 °C. The products were separated on 8% urea-PAGE sequencing gels. The positions of the products (P) and the radioactively labeled template (T) are indicated. In the absence of heparin, the proteins can rebind to continue DNA synthesis. Heparin is used to trap free POL $\gamma$ , preventing the enzyme from rebinding and continuing DNA synthesis after dissociation from the template. Arrows indicate the longest products identified for POL $\gamma$ A, both in isolation and with the holoenzymes.  $n = 2$  independent experiments.

**b.** The dissociation rate constants,  $k_{off}$  ( $s^{-1}$ ) determined for hPOL $\gamma$  and mPOL $\gamma$  are shown. Off-rate was determined using a single-nucleotide incorporation assay at varying time points. The fraction of 26-mer product formed was plotted against time (s). Following linear regression fitting,  $k_{off}$  was calculated by dividing the slope of the linear phase by the concentration of POL $\gamma$  in the reaction. Data are presented as mean  $\pm$  s.d.,  $n = 2$  independent experiments.

**c.** Time-course experiments performed as outlined in Fig. 2a reveal that mPOL $\gamma$ B stimulates replication better than hPOL $\gamma$ B for both hPOL $\gamma$ A<sup>WT</sup> and mPOL $\gamma$ A<sup>WT</sup>, as well as for all mutant mouse and human variants during TWINKLE-dependent rolling-circle DNA replication. mPOL $\gamma$ <sup>WT</sup> and hPOL $\gamma$ <sup>WT</sup>, mutant variants and mixing variants, as indicated, were incubated with TWINKLE, mtSSB, and the rolling-circle template at 37 °C for the indicated times. The polymerase concentration is always the same; when mixing two variants, half of each is used to match the final concentration in single-polymerase reactions. DNA synthesis was monitored as the incorporation of radioactive nucleotides, and the products of increasing length were separated on a 0.8% alkaline agarose gel. Template (T); Products (P).  $n = 2$  independent experiments.

Source data are provided as a Source Data file.

a

| ×                              | <i>Polg</i> <sup>+/KO</sup>                                                       | <i>Polg</i> <sup>+/A449T</sup>                                                    | <i>Polg</i> <sup>+/W726S</sup>                                                    | <i>Polg</i> <sup>+/Y933C</sup>                                                      | <i>Polg</i> <sup>+/G826S</sup>                                                      |
|--------------------------------|-----------------------------------------------------------------------------------|-----------------------------------------------------------------------------------|-----------------------------------------------------------------------------------|-------------------------------------------------------------------------------------|-------------------------------------------------------------------------------------|
| <i>Polg</i> <sup>+/KO</sup>    |  |  |  |    |   |
| <i>Polg</i> <sup>+/A449T</sup> |  |  |  |   |  |
| <i>Polg</i> <sup>+/W726S</sup> |  |  |  |  |  |
| <i>Polg</i> <sup>+/Y933C</sup> |  |  |  |   |  |
| <i>Polg</i> <sup>+/G826S</sup> |  |  |  |  |  |

b

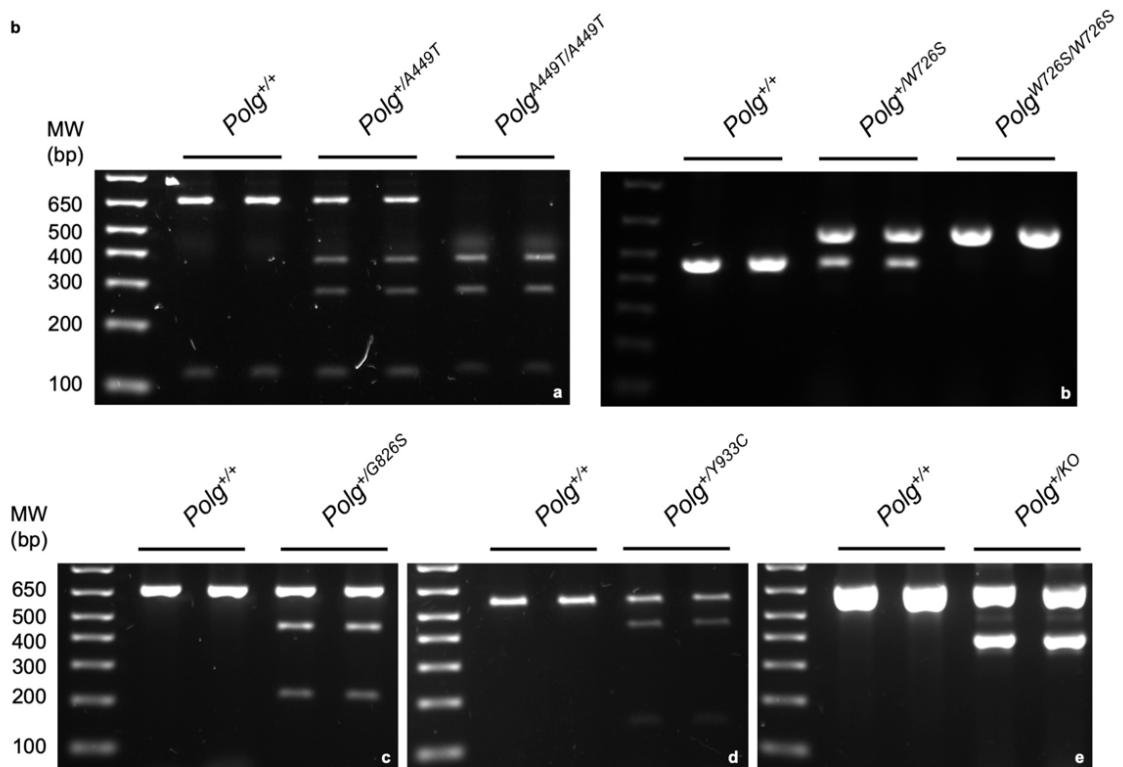

**Supplementary Fig. 15. Breeding scheme and genotyping.**

**a.** Red crosses indicate matings that have not been done; skulls and crossbones indicate pre-weaning lethality. Created in BioRender. Zuppardo, A. (2025) <https://BioRender.com/difmonx>.

**b.** Genotyping PCR of wild-type and mutant mice. *a:* *Polg*<sup>A449T</sup> (+/+ : 652bp and 117 bp; +/- : 652bp, 372bp, 280bp and 117bp; -/- : 372bp, 280bp and 117bp). *b:* *Polg*<sup>W726S</sup> (+/+ : 460bp; +/- : 460bp and 580bp; -/- : 580bp). *c:* *Polg*<sup>G826S</sup> (+/+ : 667bp; +/- : 459bp and 208bp). *d:* *Polg*<sup>Y933C</sup> (+/+ : 561bp; +/- : 131bp and 430bp). *e:* *Polg*<sup>KO</sup> (+/+ : 664bp; +/- : 664bp and 399bp).

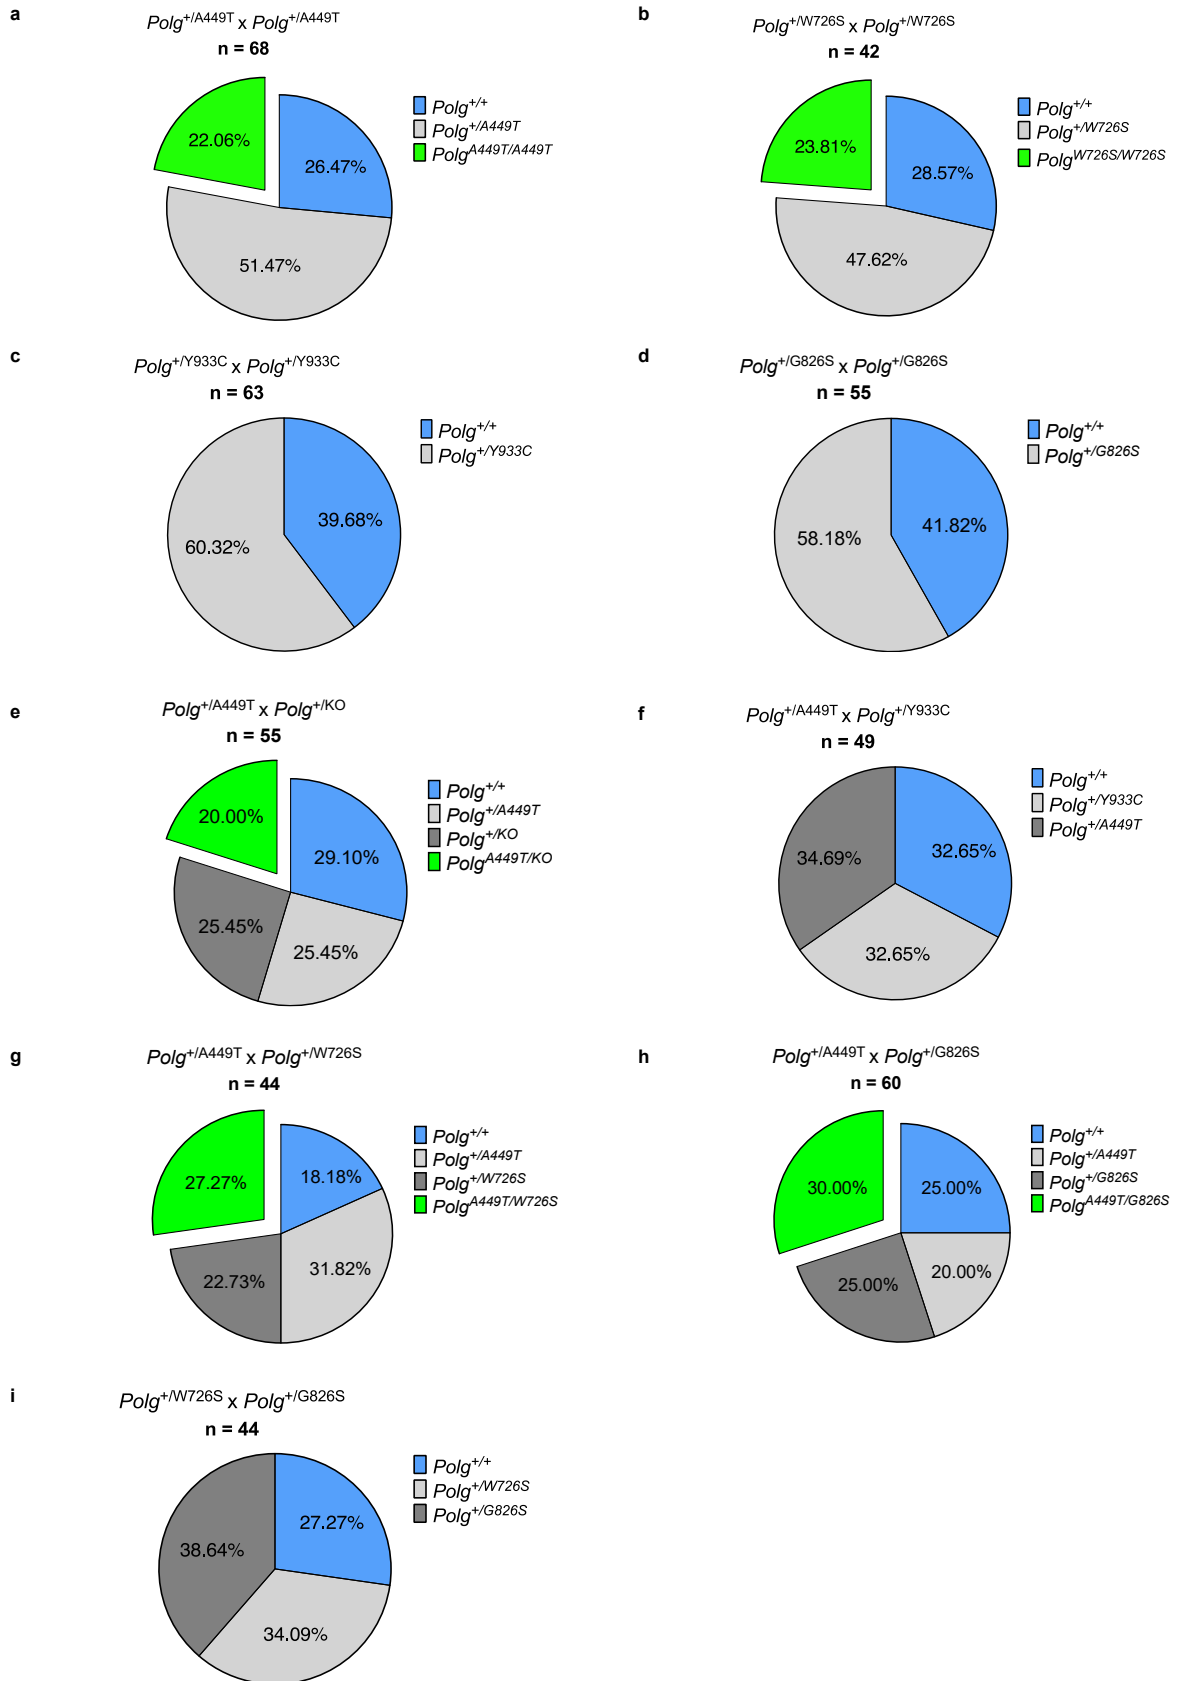

**Supplementary Fig. 16. Mendelian distribution of the mutants.**

Genotype frequencies of:

- a. *Polg*<sup>+/A449T</sup> intercross ( $\chi$ -square = 0.3235 with 2 df, ns p=0.8506),
- b. *Polg*<sup>+/W726S</sup> intercross ( $\chi$ -square = 0.2857 with 2 df, ns p=0.8669),
- c. *Polg*<sup>+/Y933C</sup> intercross ( $\chi$ -square = 22.52 with 2 df, \*\*\*\* p<0.0001),
- d. *Polg*<sup>+/G826S</sup> intercross ( $\chi$ -square = 20.71 with 2 df, \*\*\*\* p<0.0001),
- e. *Polg*<sup>+/A449T</sup> x *Polg*<sup>+/KO</sup> ( $\chi$ -square = 0.9273 with 3 df, ns p=0.8188),
- f. *Polg*<sup>+/A449T</sup> x *Polg*<sup>+/Y933C</sup> ( $\chi$ -square = 16.39 with 3 df, \*\*\* p=0.0009),
- g. *Polg*<sup>+/A449T</sup> x *Polg*<sup>+/W726S</sup> ( $\chi$ -square = 1.818 with 3 df, ns p=0.6110),
- h. *Polg*<sup>+/A449T</sup> x *Polg*<sup>+/G826S</sup> ( $\chi$ -square = 1.2 with 3 df, ns p=0.7530), and
- i. *Polg*<sup>+/W726S</sup> x *Polg*<sup>+/G826S</sup> ( $\chi$ -square = 15.82 with 3 df, \*\* p=0.0012) mice.

The number of animals for every strain is reported above each graph. Source data are provided as a Source Data file

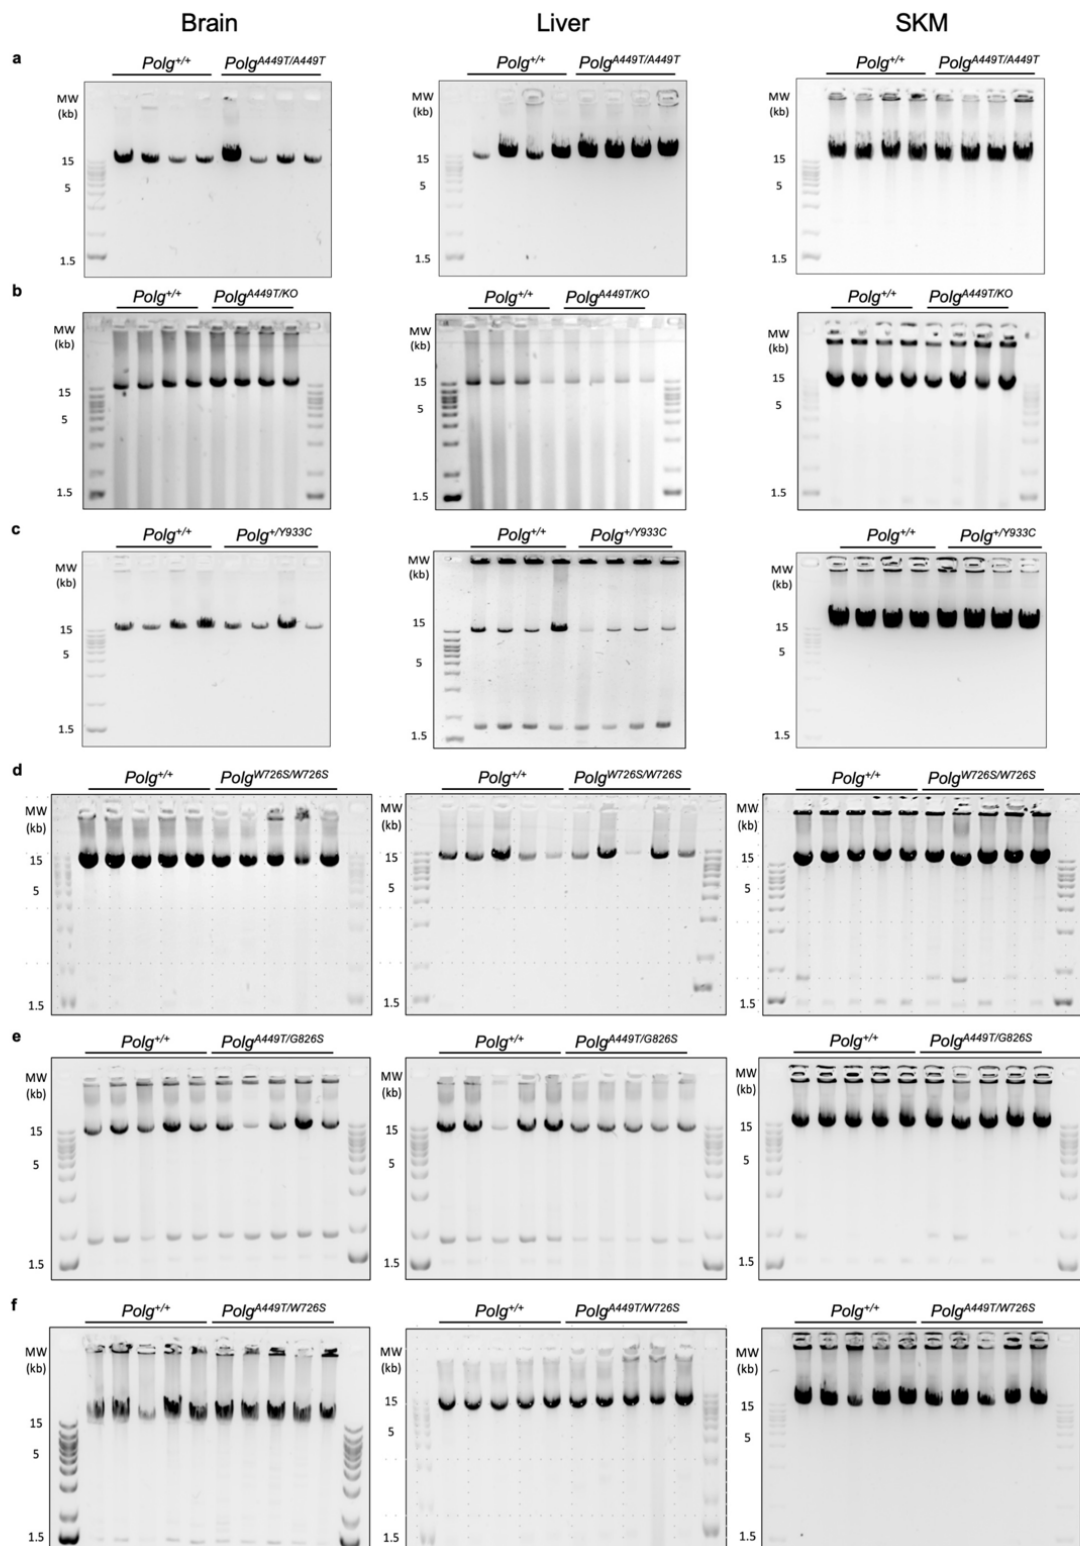

**Supplementary Fig. 17. Long-range PCR performed in DNA isolated from brain, liver, and quadriceps (SKM) of 3-month-old mice.**

**a.** *Polg*<sup>A449T/A449T</sup> (*n* = 4/genotype)

**b.** *Polg*<sup>A449T/KO</sup> (*n* = 4/genotype)

**c.** *Polg*<sup>+/Y933C</sup> (*n* = 4/genotype)

**d.** *Polg*<sup>W726S/W726S</sup> (*n* = 5/genotype)

**e.** *Polg*<sup>A449T/G826S</sup> (*n* = 5/genotype)

**f.** *Polg*<sup>A449T/W726S</sup> (*n* = 5/genotype)

Primers amplified a fragment of 15781 bp of the mtDNA. An aspecific band at 1.8 Kb is present in both mutants and wild-type in some gels. The bands were visualized by SYBR™ safe staining. Each lane represents a biological replicate. Source data are provided as a Source Data file.

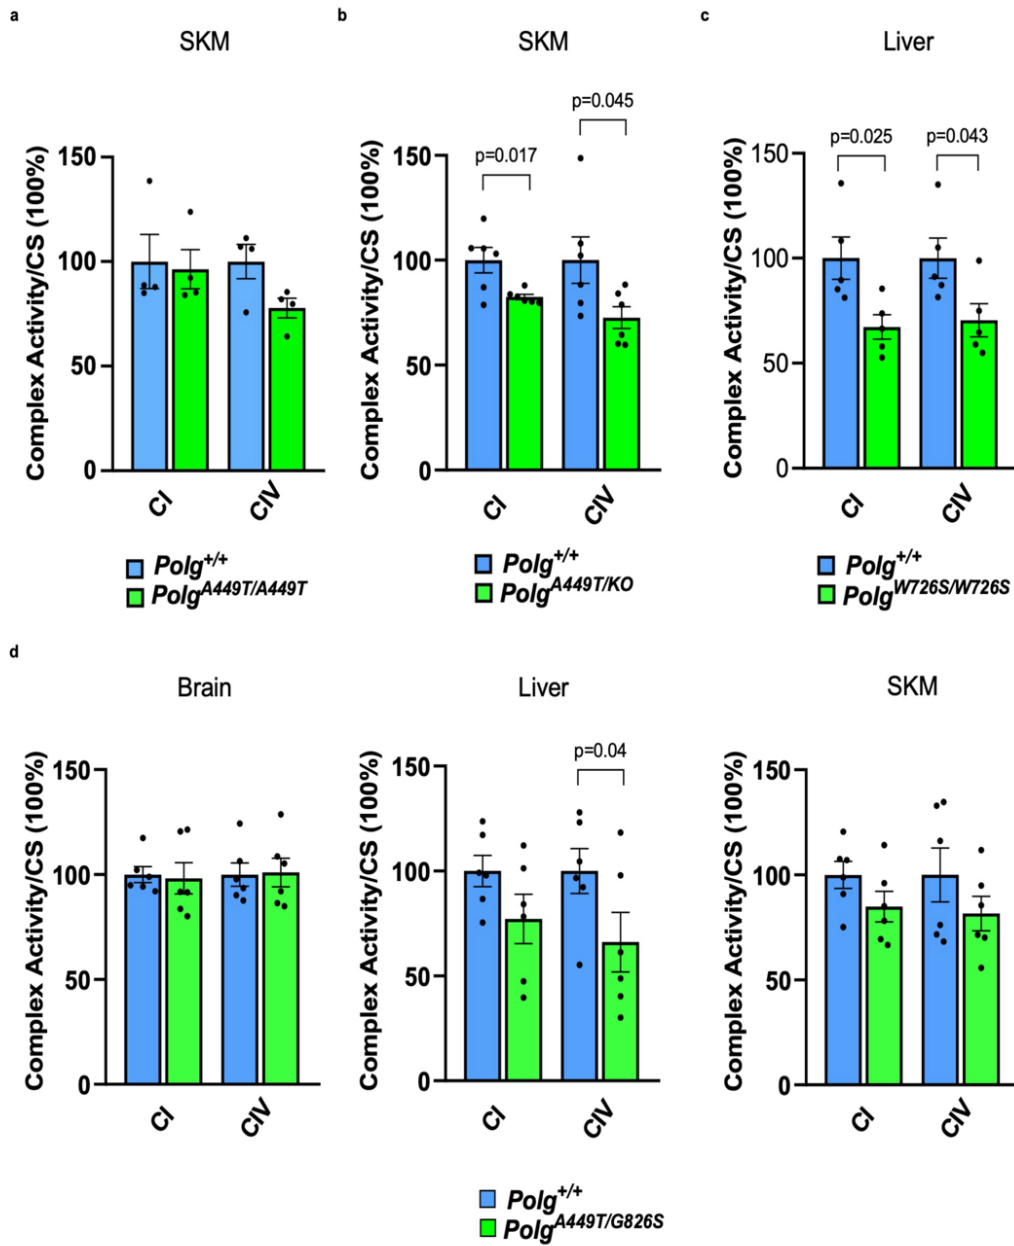

### Supplementary Fig. 18. Analysis of OXPHOS activities.

Spectrophotometric activity of complex I (CI) and complex IV (CIV), normalized to citrate synthase (CS), in:

- SKM of  $Polg^{+/+}$  and  $Polg^{A449T/A449T}$  mice ( $n = 4/\text{genotype}$ ),
- SKM of  $Polg^{+/+}$  and  $Polg^{A449T/KO}$  mice ( $n = 6/\text{genotype}$ ),
- Liver of  $Polg^{+/+}$  and  $Polg^{W726S/W726S}$  animals ( $n = 5/\text{genotype}$ ),
- Brain, liver, SKM of  $Polg^{+/+}$  and  $Polg^{A449T/G826S}$  mice ( $n = 6/\text{genotype}$ ).

Both males and females were used. Data are presented as mean  $\pm$ SEM. P-values were calculated by two tailed unpaired Student's t-test. Source data are provided as a Source Data file.

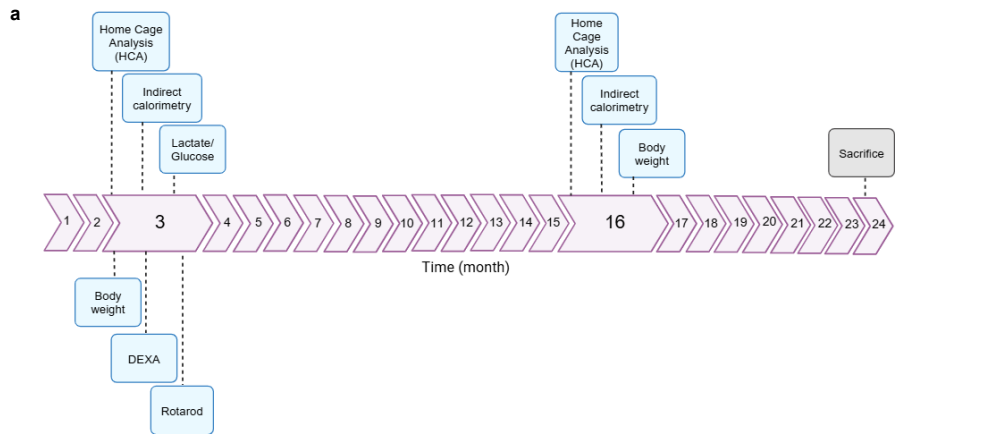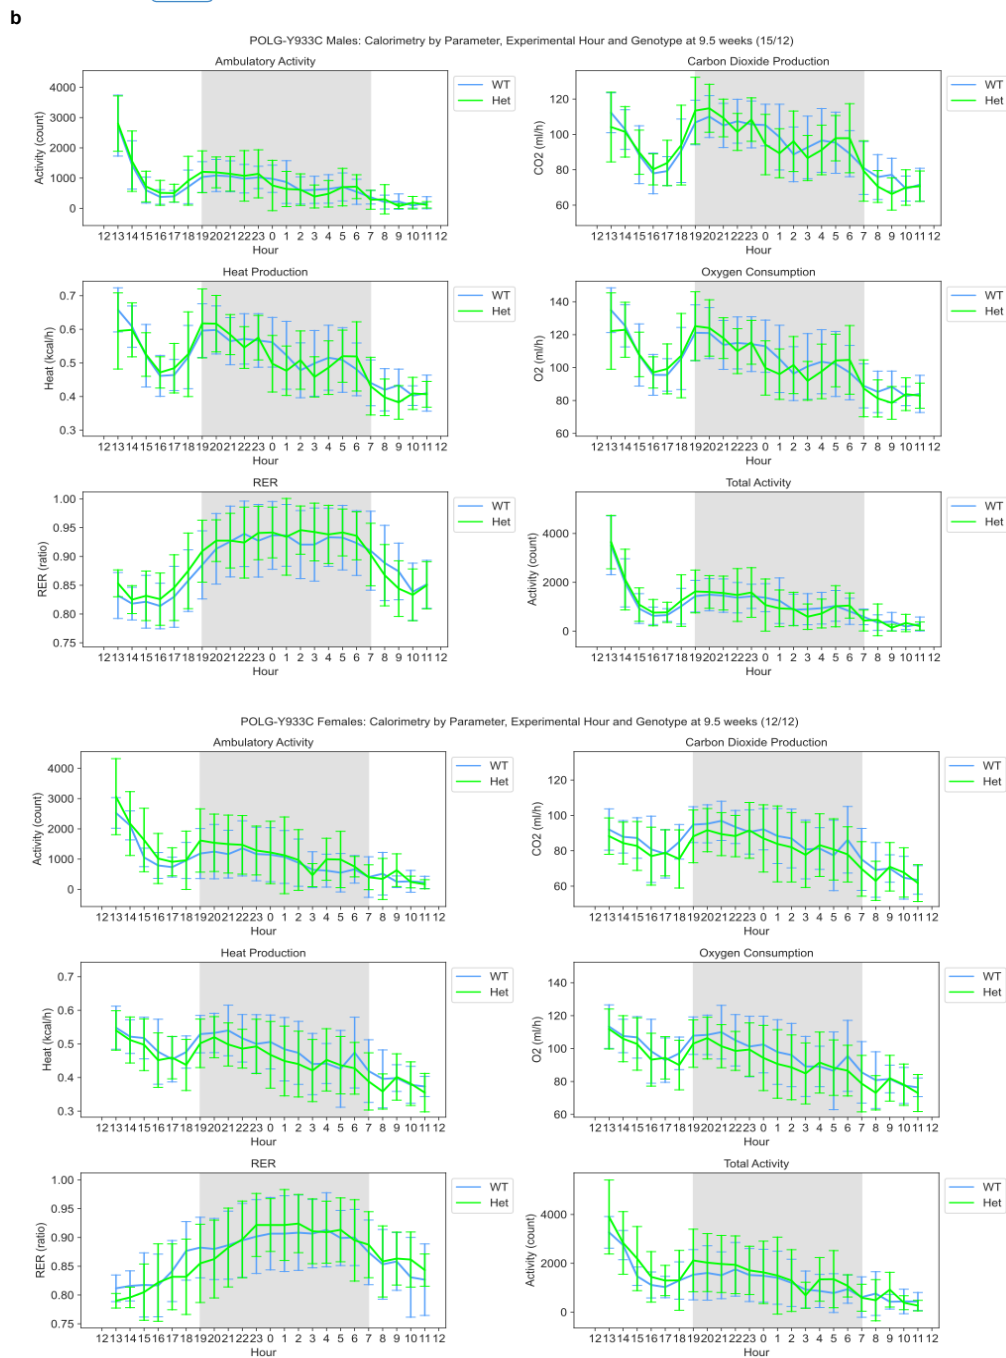

**Supplementary Fig. 19. *In vivo* phenotypization of 3-month-old  $Polg^{+/+}$  and  $Polg^{+/Y933C}$  females and males.**

**a.** Schematic overview of the *in vivo* pipeline.

**b.** Indirect calorimetry for males ( $n = 15$  WT and 12  $Polg^{+/Y933C}$  (Het); upper panel) and females ( $n = 12$  WT and 12  $Polg^{+/Y933C}$  (Het); lower panels). The shaded grey background represents the dark period, the white background the light period. Ambulatory activity, CO<sub>2</sub> production, O<sub>2</sub> consumption, Heat production, RER, and total movements measured with CLAMS are shown. See Methods for details. Source data are provided as a Source Data file.

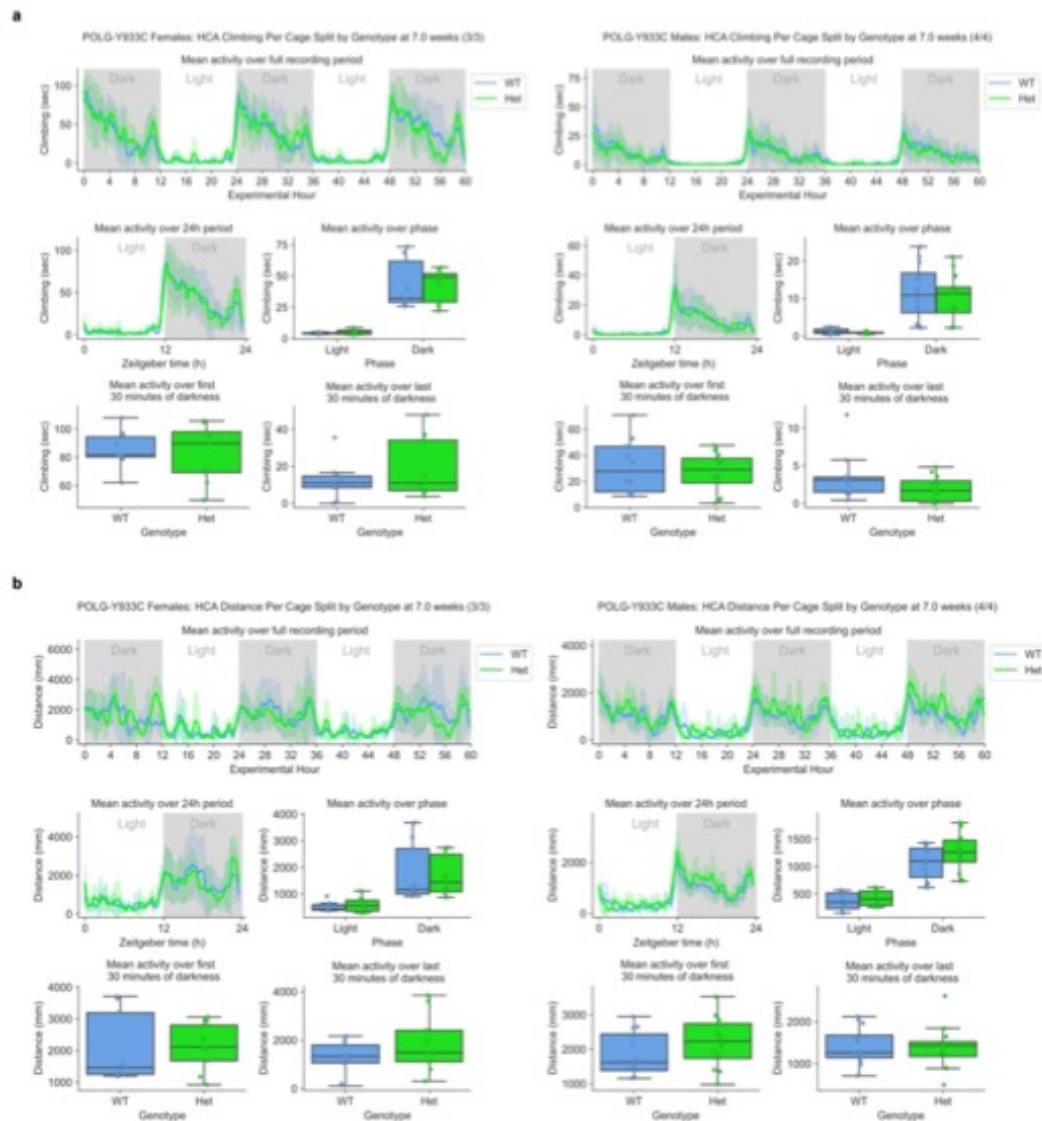

**Supplementary Fig. 20. HCA analysis of 3-month-old *Polg*<sup>+/+</sup> and *Polg*<sup>+Y933C</sup> females and males.**

**a.** Climbing activity for females ( $n = 3$  WT and 3 *Polg*<sup>+Y933C</sup> (Het); left panel) and males ( $n = 4$  WT and 4 *Polg*<sup>+Y933C</sup> (Het); right panel).

**b.** Distance for females ( $n = 3$  WT and 3 *Polg*<sup>+Y933C</sup> (Het); left panel) and males ( $n = 4$  WT and 4 *Polg*<sup>+Y933C</sup> (Het); right panel). Source data are provided as a Source Data file.

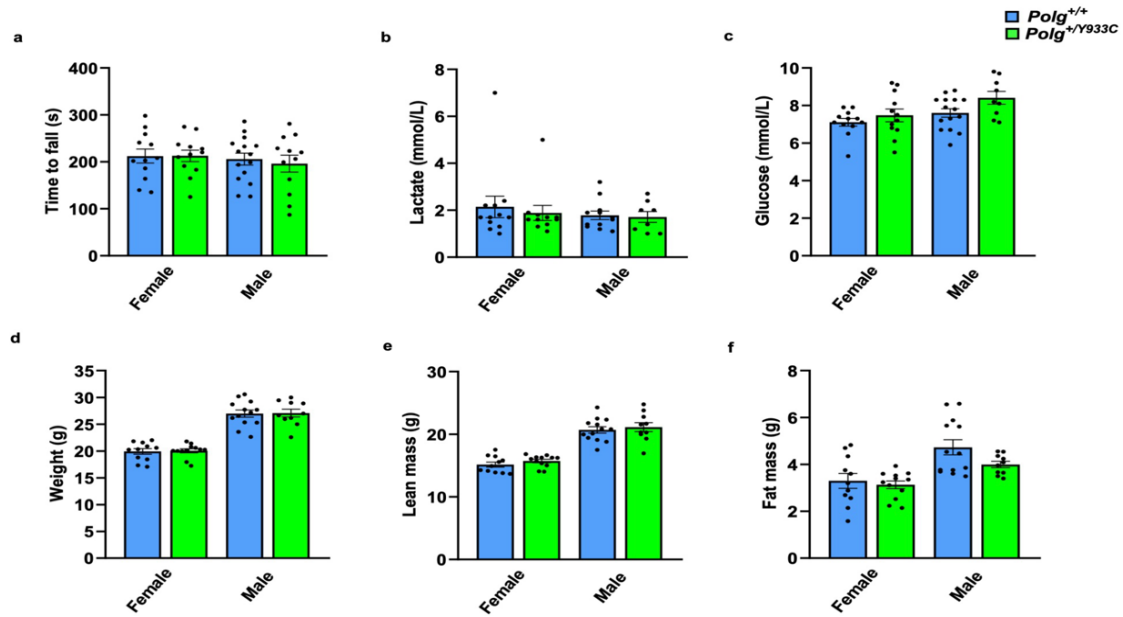

**Supplementary Fig. 21. Metabolic analysis of 3-month-old *Polg*<sup>+/+</sup> and *Polg*<sup>+/Y933C</sup> females and males.**

- a.** Rotarod performance (females  $n = 12/\text{genotype}$ ; males  $n = 15$  WT and 12 *Polg*<sup>+/Y933C</sup>).
- b.** Lactate levels (females  $n = 12$  WT and 12 *Polg*<sup>+/Y933C</sup>; males  $n = 12$  WT and 8 *Polg*<sup>+/Y933C</sup>).
- c.** Glucose levels (females  $n = 12/\text{genotype}$ ; males  $n = 15$  WT and 9 *Polg*<sup>+/Y933C</sup>).
- d.** Body weights (females  $n = 11$  WT and 12 *Polg*<sup>+/Y933C</sup>; males  $n = 13$  WT and 10 *Polg*<sup>+/Y933C</sup>).
- e-f.** Lean and fat mass (females  $n = 11$  WT and 12 *Polg*<sup>+/Y933C</sup>; males  $n = 13$  WT and 10 *Polg*<sup>+/Y933C</sup>).

Source data are provided as a Source Data file.

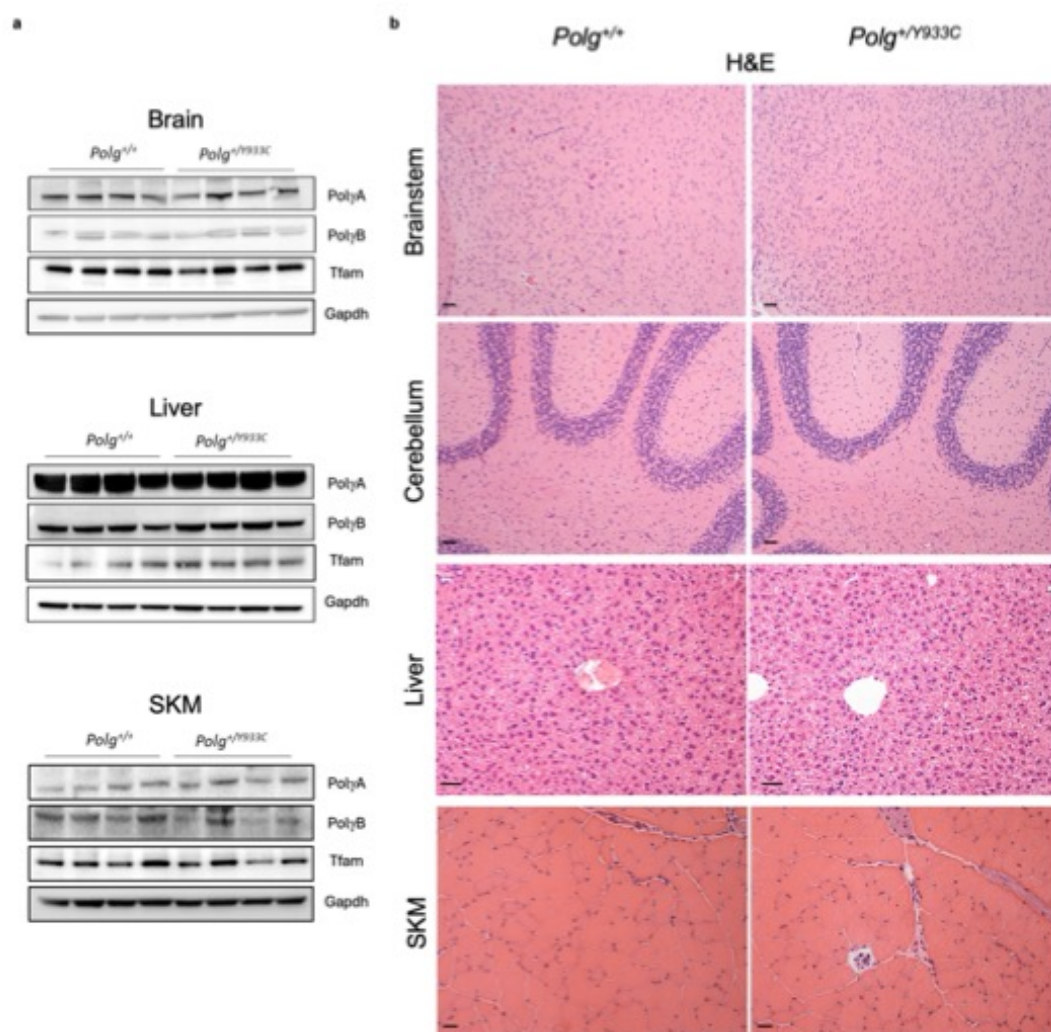

**Supplementary Fig. 22. Postmortem analysis of 3-month-old *Polg*<sup>+/+</sup> and *Polg*<sup>+/Y933C</sup> mice.**

**a.** Western blot analysis of the mitochondrial replisome in brain, liver and skeletal muscle ( $n = 4/\text{genotype}$ ). Both males and females were used.

**b.** H&E staining was performed in brainstem, cerebellum, liver and SKM samples of *Polg*<sup>+/+</sup> (left) and *Polg*<sup>+/Y933C</sup> (right) animals. H&E staining did not reveal any obvious morphological alterations. Scale bars: brainstem and cerebellum 50  $\mu\text{m}$ , liver 40  $\mu\text{m}$ ; SKM 20  $\mu\text{m}$ . ( $n = 3/\text{genotype}$ ). Both males and females were used.

Source data are provided as a Source Data file.

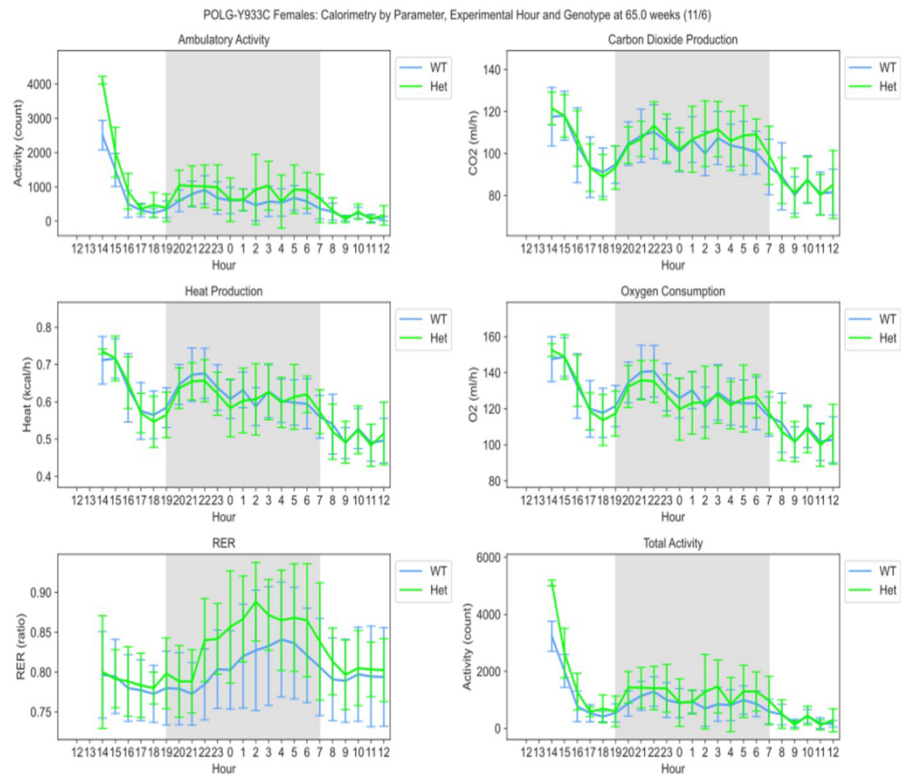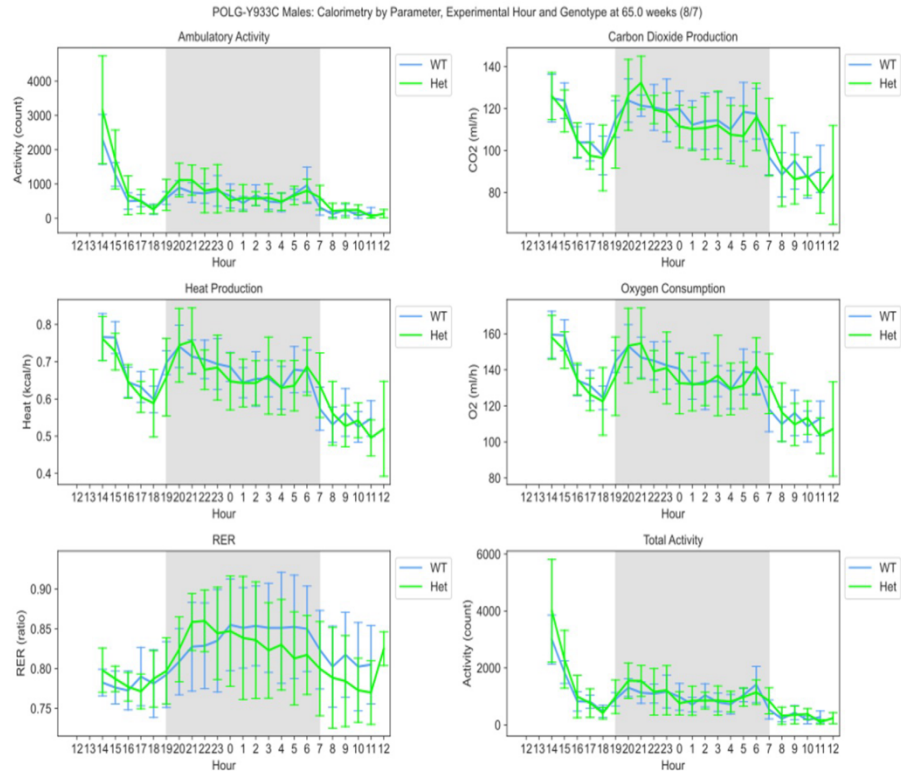

**Supplementary Fig. 23. Indirect calorimetry of 16-month-old *Polg*<sup>+/+</sup> and *Polg*<sup>+/*Y933C*</sup> females and males.**

Indirect calorimetry for females ( $n = 11$  WT and 6 *Polg*<sup>+/*Y933C*</sup> (Het); upper panel) and males ( $n = 6$  WT and 7 *Polg*<sup>+/*Y933C*</sup> (Het); lower panel). The shaded grey background represents the dark period, the white background the light period. Ambulatory activity, CO<sub>2</sub> production, O<sub>2</sub> consumption, Heat production, RER, and total movements measured with CLAMS are shown. See Methods for details. Source data are provided as a Source Data file.

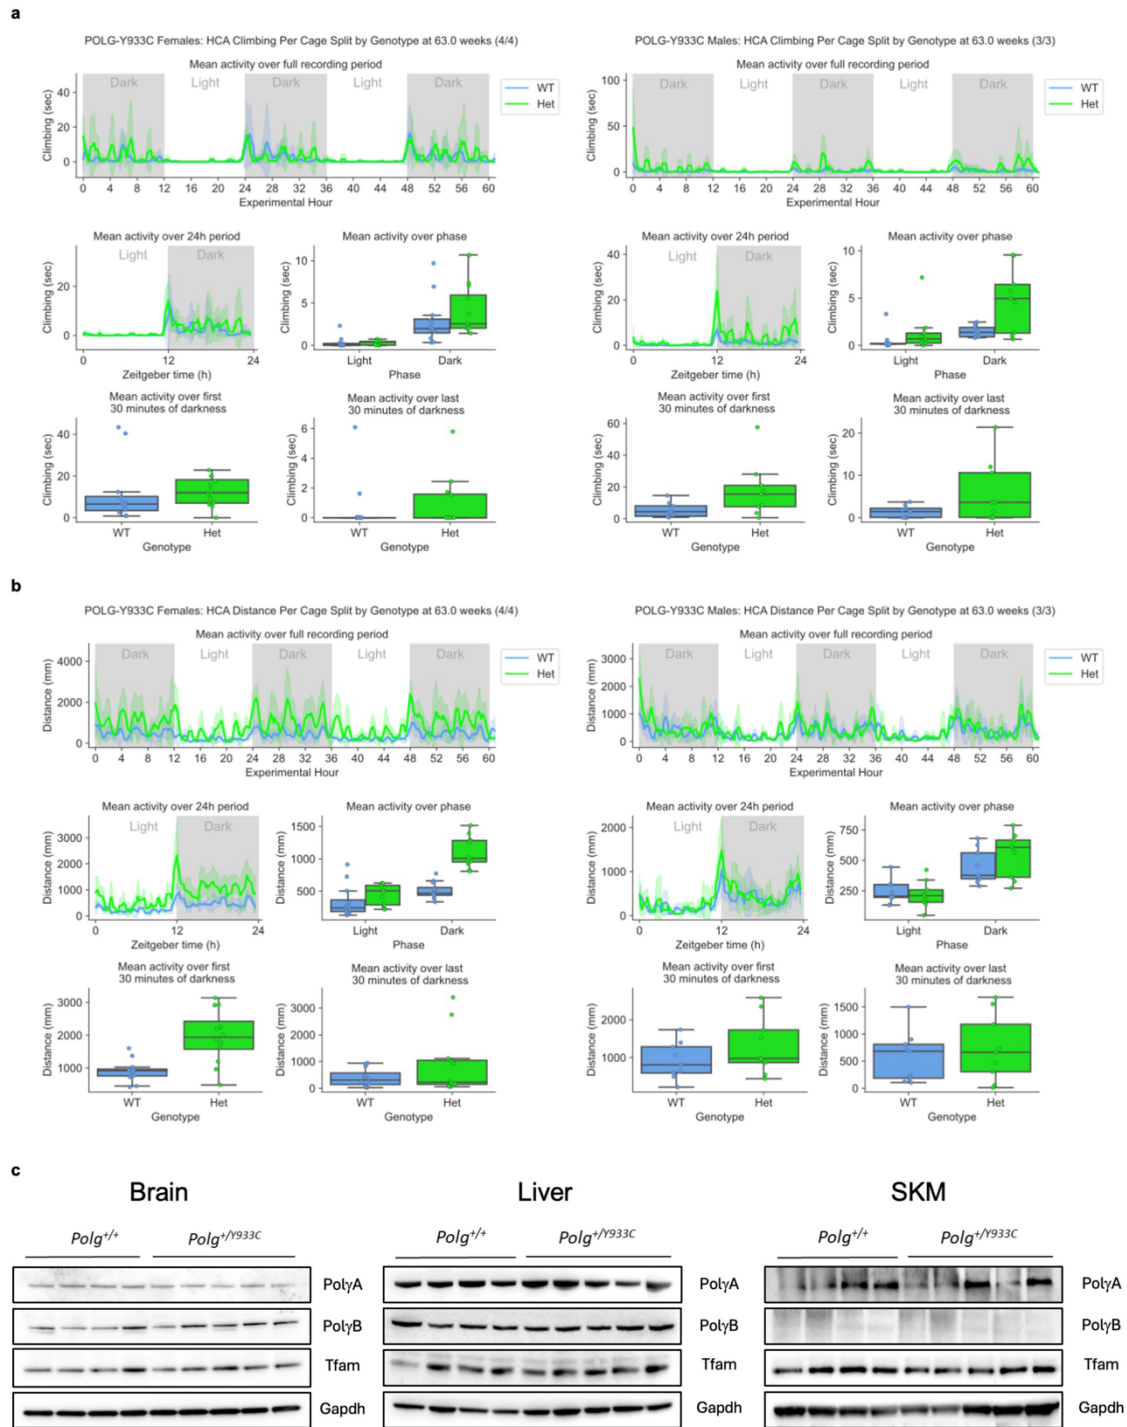

**Supplementary Fig. 24. Analysis of old *Polg*<sup>+/+</sup> and *Polg*<sup>+Y933C</sup> females and males**

**a.** HCA climbing activity at 16 months of age for females ( $n = 4$  WT and 4 *Polg*<sup>+Y933C</sup> (Het); left panel) and males ( $n = 3$  WT and 3 *Polg*<sup>+Y933C</sup> (Het); right panel).

**b.** HCA distance at 16 months of age for females ( $n = 4$  WT and 4 *Polg*<sup>+Y933C</sup> (Het); left panel) and males ( $n = 3$  WT and 3 *Polg*<sup>+Y933C</sup> (Het); right panel).

**c.** Western blot analysis of the mitochondrial replisome in brain, liver and skeletal muscle from 24-month-old mice ( $n = 4$  WT and 5 *Polg*<sup>+/*Y933C*</sup>). Both males and females were used. Source data are provided as a Source Data file.

**Supplementary table 1.** Cryo-EM data collection, refinement and validation statistics.

|                                                     | Mouse POL $\gamma$                        |                                           |                                           | Mouse POL $\gamma$ A<br>Human POL $\gamma$ B |                                                         |                                                         | Human POL $\gamma$ A<br>Mouse POL $\gamma$ B |                                                         |
|-----------------------------------------------------|-------------------------------------------|-------------------------------------------|-------------------------------------------|----------------------------------------------|---------------------------------------------------------|---------------------------------------------------------|----------------------------------------------|---------------------------------------------------------|
|                                                     | R-conformer<br>(EMDB-51109)<br>(PDB 9G74) | I-conformer<br>(EMDB-51110)<br>(PDB 9G75) | E-conformer<br>(EMDB-51114)<br>(PDB 9G77) | R-conformer<br>(EMDB-52815)<br>(PDB 9IBX)    | E-conformer<br>Human-like<br>(EMDB-52819)<br>(PDB 9IBZ) | E-conformer<br>Mouse-like<br>(EMDB-52823)<br>(PDB 9IC0) | R-conformer<br>(EMDB-52824)<br>(PDB 9IC1)    | E-conformer<br>Mouse-like<br>(EMDB-52828)<br>(PDB 9IC3) |
| <b>Data collection and processing</b>               |                                           |                                           |                                           |                                              |                                                         |                                                         |                                              |                                                         |
| Magnification                                       | 105,000                                   | 105,000                                   | 105,000                                   | 105,000                                      | 105,000                                                 | 105,000                                                 | 105,000                                      | 105,000                                                 |
| Voltage (kV)                                        | 300                                       | 300                                       | 300                                       | 300                                          | 300                                                     | 300                                                     | 300                                          | 300                                                     |
| Electron exposure (e <sup>-</sup> /Å <sup>2</sup> ) | 40                                        | 40                                        | 40                                        | 40                                           | 40                                                      | 40                                                      | 40                                           | 40                                                      |
| Defocus range (μm)                                  | 0.8-2.2                                   | 0.8-2.2                                   | 0.8-2.2                                   | 0.8-2.2                                      | 0.8-2.2                                                 | 0.8-2.2                                                 | 0.8-2.2                                      | 0.8-2.2                                                 |
| Pixel size (Å)                                      | 0.825                                     | 0.825                                     | 0.825                                     | 0.828                                        | 0.828                                                   | 0.828                                                   | 0.828                                        | 0.828                                                   |
| Symmetry imposed                                    | C1                                        | C1                                        | C1                                        | C1                                           | C1                                                      | C1                                                      | C1                                           | C1                                                      |
| Initial particle images (no.)                       | 10,917,170                                | 10,917,170                                | 10,917,170                                | 6,368,562                                    | 6,368,562                                               | 6,368,562                                               | 9,142,462                                    | 9,142,462                                               |
| Final particle images (no.)                         | 832,556                                   | 275,211                                   | 930,574                                   | 713,960                                      | 370,910                                                 | 212,286                                                 | 448,270                                      | 516,159                                                 |
| Map resolution (Å)                                  | 2.75                                      | 2.98                                      | 2.87                                      | 2.54                                         | 3.08                                                    | 3.24                                                    | 2.73                                         | 2.96                                                    |
| FSC threshold                                       | 0.143                                     | 0.143                                     | 0.143                                     | 0.143                                        | 0.143                                                   | 0.143                                                   | 0.143                                        | 0.143                                                   |
| Map resolution range (Å)                            | 2.3-31.5                                  | 2.6-41.0                                  | 2.5-38.7                                  | 2.2-4.9                                      | 2.7-44.5                                                | 2.8-39.2                                                | 2.4-29.5                                     | 2.5-43.4                                                |
| <b>Refinement</b>                                   |                                           |                                           |                                           |                                              |                                                         |                                                         |                                              |                                                         |
| Initial model used (PDB code)                       | 4ZTZ                                      | 4ZTZ                                      | 4ZTZ                                      | 4ZTZ                                         | 4ZTZ                                                    | 4ZTZ                                                    | 4ZTZ                                         | 4ZTZ/8D42                                               |
| Model resolution (Å)                                | 3.1                                       | 3.4                                       | 3.0                                       | 3.2                                          | 3.5                                                     | 3.7                                                     | 3.4                                          | 3.4                                                     |
| FSC threshold                                       | 0.5                                       | 0.5                                       | 0.5                                       | 0.5                                          | 0.5                                                     | 0.5                                                     | 0.5                                          | 0.5                                                     |
| Model composition                                   |                                           |                                           |                                           |                                              |                                                         |                                                         |                                              |                                                         |
| Non-hydrogen atoms                                  | 14,683                                    | 13,780                                    | 14,790                                    | 14,129                                       | 14,339                                                  | 13,987                                                  | 14,182                                       | 13,841                                                  |
| Protein/DNA residues                                | 1,741/38                                  | 1,634/38                                  | 1,742/41                                  | 1,661/38                                     | 1,680/41                                                | 1,636/41                                                | 1,682/38                                     | 1,627/41                                                |
| Ligands                                             | 2                                         | 0                                         | 3                                         | 2                                            | 3                                                       | 3                                                       | 2                                            | 4                                                       |
| B factors (Å <sup>2</sup> )                         |                                           |                                           |                                           |                                              |                                                         |                                                         |                                              |                                                         |
| Protein                                             | 58.79                                     | 50.11                                     | 67.36                                     | 118.96                                       | 130.30                                                  | 73.63                                                   | 69.90                                        | 42.28                                                   |
| DNA                                                 | 76.04                                     | 137.47                                    | 114.76                                    | 150.28                                       | 222.85                                                  | 149.57                                                  | 107.36                                       | 115.44                                                  |
| Ligands                                             | 59.51                                     | -                                         | 102.71                                    | 138.07                                       | 172.96                                                  | 95.31                                                   | 74.30                                        | 66.42                                                   |
| R.m.s. deviations                                   |                                           |                                           |                                           |                                              |                                                         |                                                         |                                              |                                                         |
| Bond lengths (Å)                                    | 0.003                                     | 0.003                                     | 0.003                                     | 0.004                                        | 0.002                                                   | 0.003                                                   | 0.003                                        | 0.005                                                   |
| Bond angles (°)                                     | 0.485                                     | 0.515                                     | 0.519                                     | 0.549                                        | 0.444                                                   | 0.519                                                   | 0.509                                        | 0.547                                                   |
| Validation                                          |                                           |                                           |                                           |                                              |                                                         |                                                         |                                              |                                                         |
| MolProbity score                                    | 1.48                                      | 1.55                                      | 1.48                                      | 1.38                                         | 1.42                                                    | 1.60                                                    | 1.31                                         | 1.69                                                    |
| Clashscore                                          | 7.50                                      | 8.40                                      | 7.18                                      | 6.32                                         | 6.37                                                    | 7.89                                                    | 5.64                                         | 9.14                                                    |
| Poor rotamers (%)                                   | 0.53                                      | 0.28                                      | 0.40                                      | 0.55                                         | 0.68                                                    | 0.56                                                    | 0.62                                         | 0.85                                                    |
| Ramachandran plot                                   |                                           |                                           |                                           |                                              |                                                         |                                                         |                                              |                                                         |
| Favored (%)                                         | 97.67                                     | 97.56                                     | 97.61                                     | 97.85                                        | 97.70                                                   | 97.01                                                   | 98.12                                        | 96.78                                                   |
| Allowed (%)                                         | 2.33                                      | 2.44                                      | 2.39                                      | 0.15                                         | 2.30                                                    | 2.99                                                    | 1.88                                         | 3.22                                                    |
| Disallowed (%)                                      | 0.00                                      | 0.00                                      | 0.00                                      | 0.00                                         | 0.00                                                    | 0.00                                                    | 0.00                                         | 0.00                                                    |

**Supplementary table 2.** Analysis of the distribution of *PolgY933C* genotypes.

| <b>Genotype</b>                   | <b>N. of animals</b> | <b>%</b> |
|-----------------------------------|----------------------|----------|
| <i>Polg<sup>Y933C/Y933C</sup></i> | 4                    | 10,53    |
| <i>Polg<sup>Y933C/+</sup></i>     | 28                   | 73,68    |
| <i>Polg<sup>+/+</sup></i>         | 6                    | 15,79    |
| <b>Total</b>                      | 38                   |          |

**Supplementary Table 3.** gRNAs, donor oligonucleotides, and primers used in this study.

|                 |                                                                                                                                                                                                                  |
|-----------------|------------------------------------------------------------------------------------------------------------------------------------------------------------------------------------------------------------------|
| gRNA_Y933C      | ATGGCCGCATCTATGGGGCT                                                                                                                                                                                             |
| ssDNA_HDR_Y933C | GGGCAGGAAGAGCAGAGGCACTGATCTGCACAGCAAGACAGCTGCCACTGTGGGCATCAGCCGAG<br>AGCATGCCAAAATCTTCAACTATGGCCGCATCTGTGGGGCTGGCCAGTCCTTTGCTGAGCGCCTACT<br>GATGCAGTTCAACCACAGGCTCACAAGGCAGGAGGCA                                |
| gRNA_G826S      | GGTGCCAGCAGTCACCACCT                                                                                                                                                                                             |
| ssDNA_HDR_G826S | TGAAAGAGGAAGAAGAGAATCCAGGAACAGAGAGGACATATACCCGAGCATTACTGGCAGTGAGCCACGT<br>GGGCTCCACAGCTCGACGGGTGATGGTGCTAGCAGTCACCACCTGTGGTAGGATGGCCCCATAGTGGCC<br>TTCCTCATCGAAGCTGGGGTGCCTGGAATAGGGAGAAGCAAAGAAGTGTCAGCAGGCTTGT |
| LongR_mtDNA_Fw  | GAGGTGATGTTTTTGGTAAACAGGCGGGGT                                                                                                                                                                                   |
| LongR_mtDNA_Rv  | GGTTCGTTTGTTCAACGATTAAAGTCCTACGTG                                                                                                                                                                                |
| A449T_Fw        | GTTGTCCCTGTCTTCCTCCA                                                                                                                                                                                             |
| A449T_Rv        | AAGCTTCCCACCTTCCTGAT                                                                                                                                                                                             |
| Y933C_Fw        | GCCTTTGGCTGGATGACTCT                                                                                                                                                                                             |
| Y933C_Rv        | CAGCGCCTGTCTATCTGCTT                                                                                                                                                                                             |
| G826S_Fw        | CAGATGGTGGTATGGCTCCC                                                                                                                                                                                             |
| G826S_Rv        | AGGACCACCTAGAAGCCCAA                                                                                                                                                                                             |
| KO_Fw1          | CTTCGTCGATCGACCTCGAATAAC                                                                                                                                                                                         |
| KO_Fw2          | GGATGGGCAGGAACAGTTAG                                                                                                                                                                                             |
| KO_Rv           | CTGCCATTACCTTACCC                                                                                                                                                                                                |
| W726S_Fw        | AGGGAACCTGTGACCATGCTCTCC                                                                                                                                                                                         |
| W726S_Rv        | GGTAACCCCACCAGGATGCCTC                                                                                                                                                                                           |
| qPCR_mCol_Fw    | TGCTAGCCGCAGGCATTACT                                                                                                                                                                                             |
| qPCR_mCol_Rv    | CGGGATCAAAGAAAGTTGTGTTT                                                                                                                                                                                          |
| qPCR_RnaseP_Fw  | GCCTACACTGGAGTCGTGCTACT                                                                                                                                                                                          |
| qPCR_RnaseP_Rv  | CTGACCACACGAGCTGGTAGAA                                                                                                                                                                                           |
